# Supplementary material for: Kinetic investigation of the cyclopropanation process of fullerene C60 by halogenmethyl ketones under the conditions of the Bingel reaction
Source: Royal Society of Chemistry journal article supplement (doi:10.1039/c9nj06326a), 2020-01-01
Supplement: c9nj06326a1.pdf [file c9nj06326a1.pdf]

Supporting information

## Kinetic Investigation of the Fullerene C<sub>60</sub> Cyclopropanation Process by Halogenmethylketones under the Conditions of Bingel Reaction

Yulya N. Biglova,<sup>\*a,b</sup> Ilshat M. Sakhautdinov,<sup>a</sup> Rustem N. Garifullin,<sup>c</sup> Gulnaz F. Sakhautdinova<sup>a</sup> and Akhat G. Mustafin<sup>a</sup>

<sup>a.</sup> *Ufa Institute of Chemistry, Ufa Federal Research Centre, Russian Academy of Sciences, 450054, Ufa, Russian Federation. E-mail: [bn.yulya@mail.ru](mailto:bn.yulya@mail.ru)*

<sup>b.</sup> *Department of Chemistry, Bashkir State University, 450076, Ufa, Russian Federation*

<sup>c.</sup> *Institute of Mathematics, Ufa Federal Research Centre, Russian Academy of Sciences, 450008, Ufa, Russian Federation*

### TABLE OF CONTENTS

|                                                                                                                                                    |     |
|----------------------------------------------------------------------------------------------------------------------------------------------------|-----|
| 1. Spectroscopic data of synthesized compounds.....                                                                                                | S2  |
| 1.1. Spectrum data <sup>1</sup> H NMR, <sup>13</sup> C NMR of halogenmethyl ketones.....                                                           | S2  |
| 1.2. Spectrum data <sup>1</sup> H NMR, <sup>13</sup> C NMR and MS-MALDI of mono-adduct <b>MMF</b> and bis-adduct <b>DMF</b> methanofullerenes..... | S8  |
| 2. HPLC quantification method.....                                                                                                                 | S12 |
| 2.1. Optimization of HPLC conditions.....                                                                                                          | S12 |
| 2.2. Absolute grading method for HPLC: peak area vs. concentration plots.....                                                                      | S13 |
| 2.3. Direct comparison vs. authentic sample.....                                                                                                   | S15 |
| 3. The effect of halogenmethyl ketones consumption on the kinetic of the process.....                                                              | S17 |
| 4. Arrhenius plots of the rate constants.....                                                                                                      | S18 |
| 5. The calculation of the reaction rate constant by using the computer algebra system MAPLE 16.....                                                | S19 |
| 6. List of Cartesian coordinates for the optimized structures.....                                                                                 | S22 |

# 1. Spectroscopic data of synthesized compounds

## 1.1. Spectrum data $^1\text{H}$ NMR, $^{13}\text{C}$ NMR of halogenmethyl ketones

### $^{13}\text{C}$ NMR – ‘chloroketone CI-K’

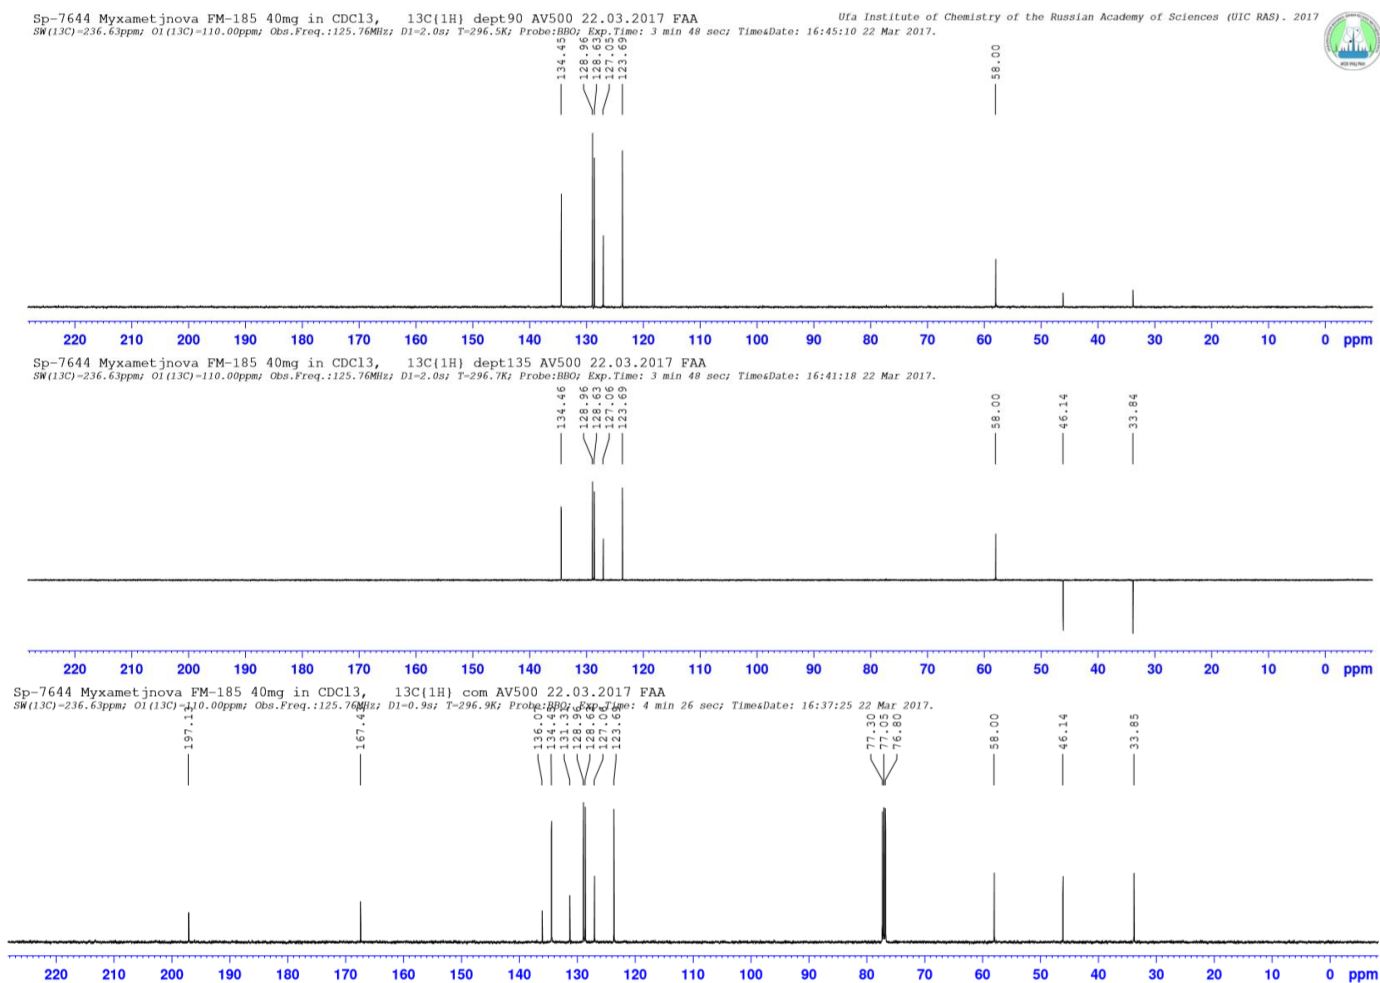

Sp-7644 Myxametjnova FM-185 40mg in CDCl<sub>3</sub>, <sup>13</sup>C{<sup>1</sup>H} dept90 AV500 22.03.2017 FAA Ufa Institute of Chemistry of the Russian Academy of Sciences (UIC RAS). 2017

SW(13C)-236.63ppm; O1(13C)-110.00ppm; Obs.Freq.:125.76MHz; D1=2.0s; T=296.5K; Probe:BBO; Exp.Time: 3 min 48 sec; TimesDate: 16:45:10 22 Mar 2017.

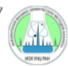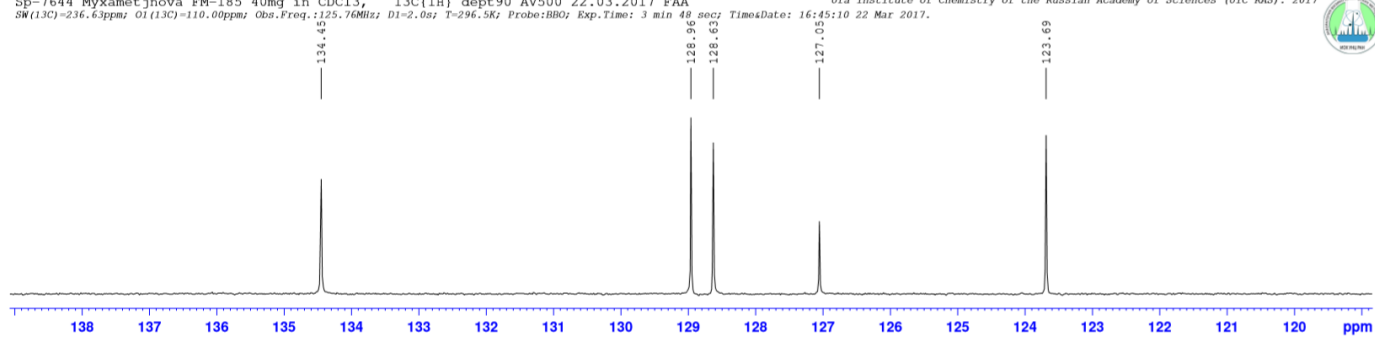

Sp-7644 Myxametjnova FM-185 40mg in CDCl<sub>3</sub>, <sup>13</sup>C{<sup>1</sup>H} dept135 AV500 22.03.2017 FAA  
SW(13C)-236.63ppm; O1(13C)-110.00ppm; Obs.Freq.:125.76MHz; D1=2.0s; T=296.7K; Probe:BBO; Exp.Time: 3 min 48 sec; TimesDate: 16:41:18 22 Mar 2017.

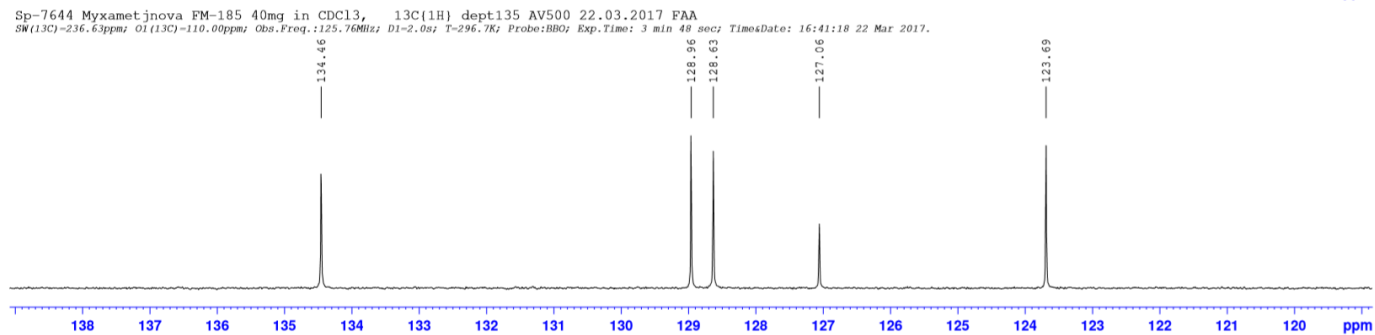

Sp-7644 Myxametjnova FM-185 40mg in CDCl<sub>3</sub>, <sup>13</sup>C{<sup>1</sup>H} com AV500 22.03.2017 FAA  
SW(13C)-236.63ppm; O1(13C)-110.00ppm; Obs.Freq.:125.76MHz; D1=0.9s; T=296.9K; Probe:BBO; Exp.Time: 4 min 26 sec; TimesDate: 16:37:25 22 Mar 2017.

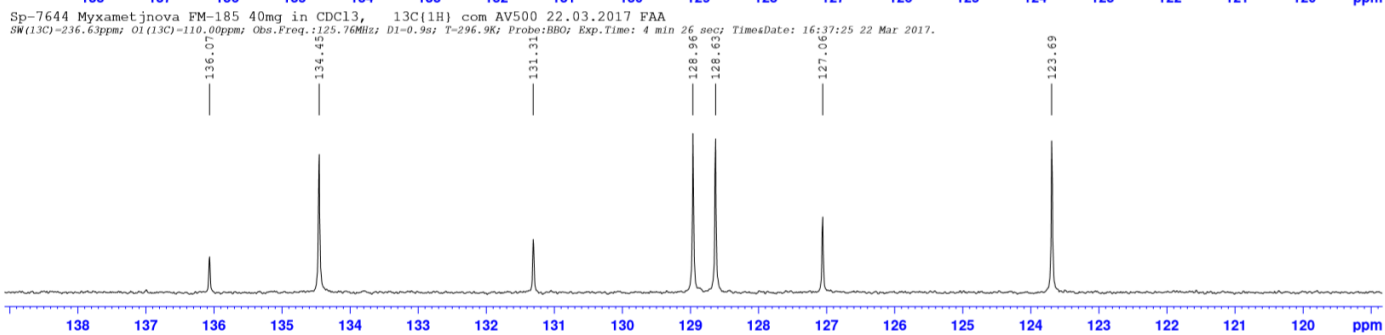

# <sup>1</sup>H NMR – ‘chloroketone CI-K’

Sp-7644 Myxamet jnova FM-185 40mg in CDCl<sub>3</sub>, <sup>1</sup>H AV500 22.03.2017 FAA

Ufa Institute of Chemistry of the Russian Academy of Sciences (IIC RAS), 2017

SW(1H)-19.99ppm; O1(1H)-7.00ppm; Obs.Proq.:500.13Mhz; D1-2.0s; T-296.2K; Probe:BB0; Exp.Time:44 sec; Time&Date: 16:32:45 22 Mar 2017.

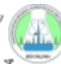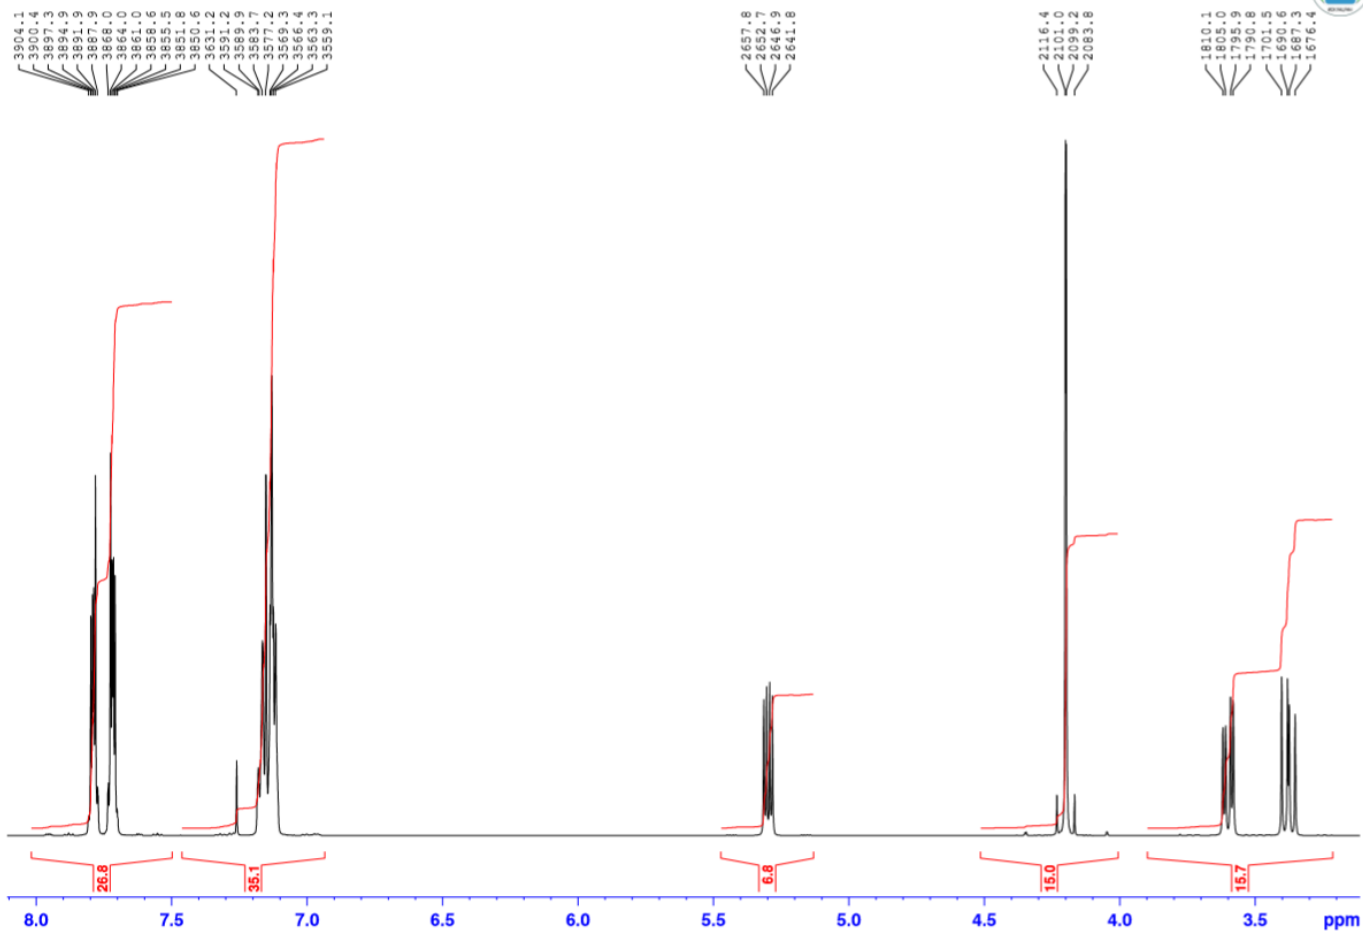

# <sup>13</sup>C NMR – ‘bromoketone Br-K’

Sp-8659 Myxametjnova FM-187 100mg in CDCl<sub>3</sub>, <sup>13</sup>C{<sup>1</sup>H} dept90 AV500 22.03.2017 FAA  
SW(13C)=236.63ppm; O1(13C)=110.00ppm; Obs.Freq.:125.76MHz; D1=2.0s; T=296.1K; Probe:BBQ; Exp.Time: 3 min 48 sec; TimesDate: 15:31:04 22 Mar 2017.

Ufa Institute of Chemistry of the Russian Academy of Sciences (UIC RAS). 2017

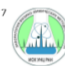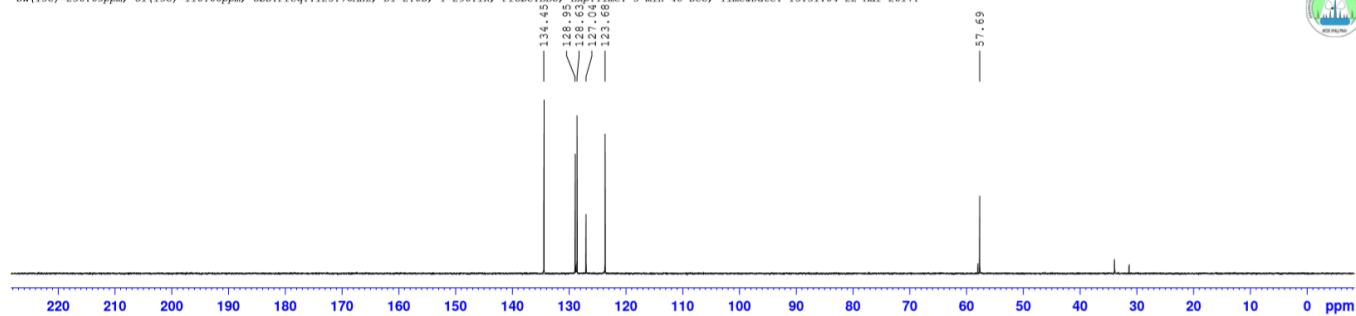

Sp-8659 Myxametjnova FM-187 100mg in CDCl<sub>3</sub>, <sup>13</sup>C{<sup>1</sup>H} dept135 AV500 22.03.2017 FAA  
SW(13C)=236.63ppm; O1(13C)=110.00ppm; Obs.Freq.:125.76MHz; D1=2.0s; T=296.2K; Probe:BBQ; Exp.Time: 3 min 48 sec; TimesDate: 15:27:11 22 Mar 2017.

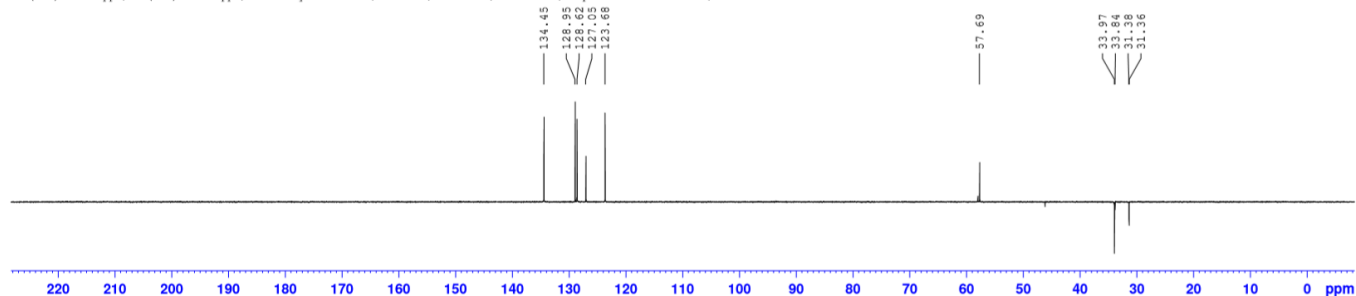

Sp-8659 Myxametjnova FM-187 100mg in CDCl<sub>3</sub>, <sup>13</sup>C{<sup>1</sup>H} com AV500 22.03.2017 FAA  
SW(13C)=236.63ppm; O1(13C)=110.00ppm; Obs.Freq.:125.76MHz; D1=0.9s; T=296.4K; Probe:BBQ; Exp.Time: 1 min 10 sec; TimesDate: 15:32:21 22 Mar 2017.

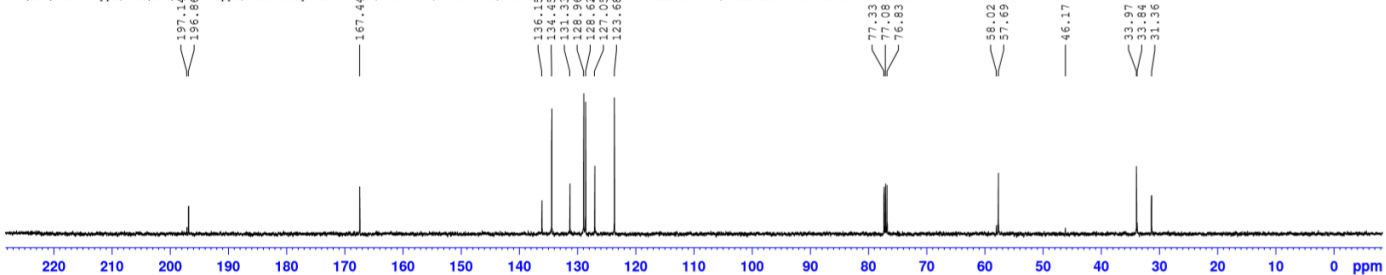

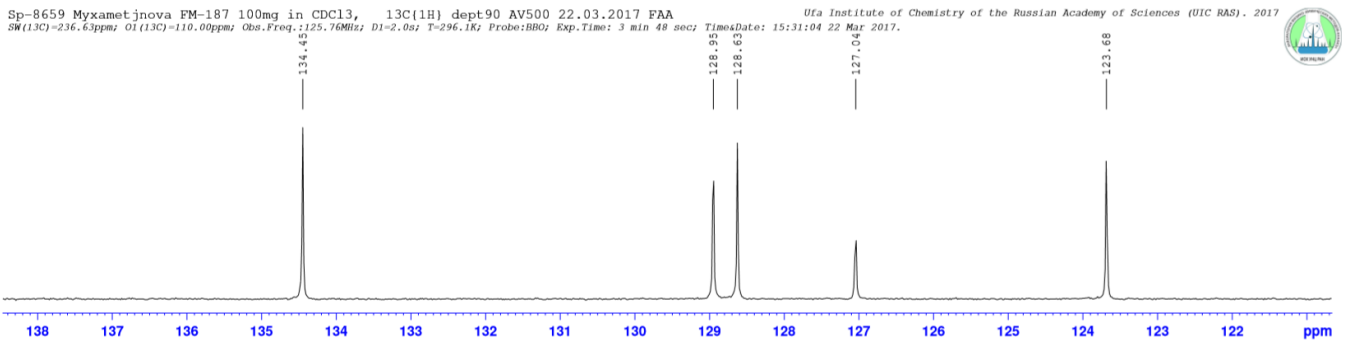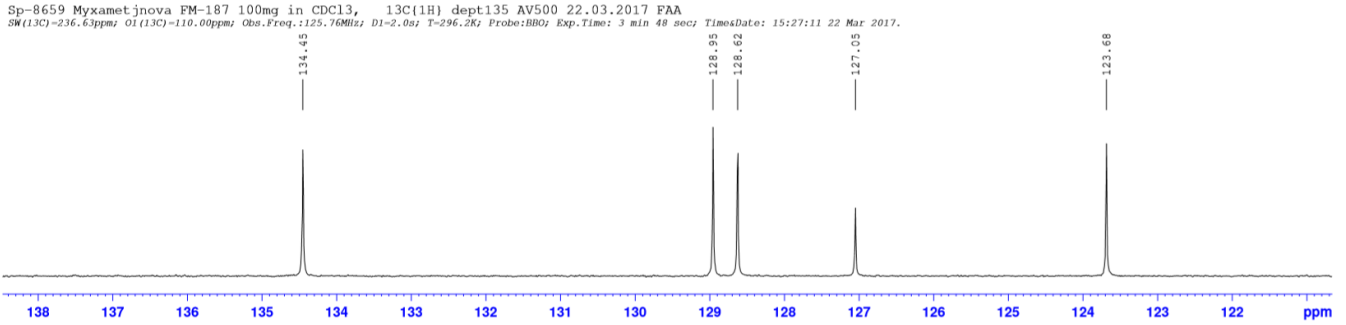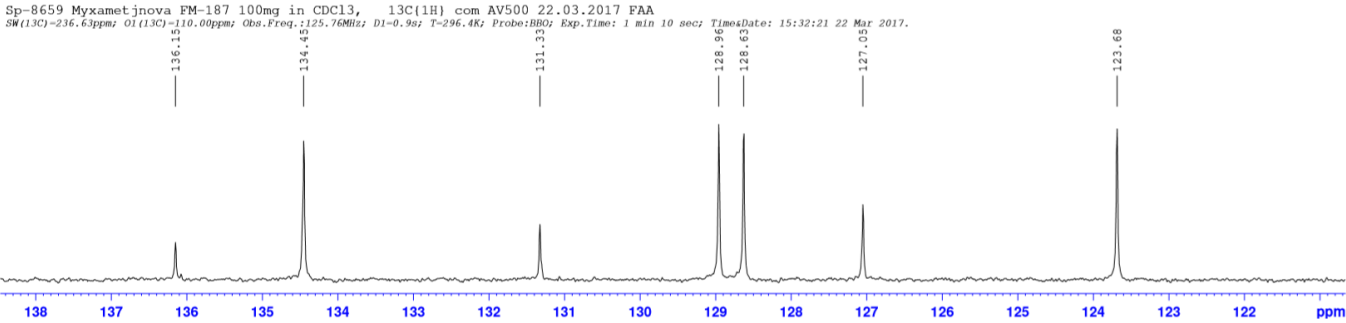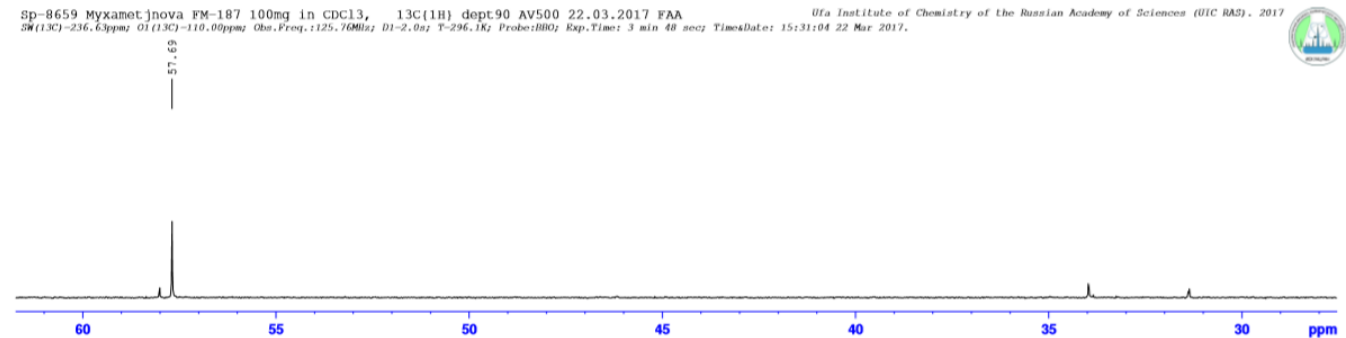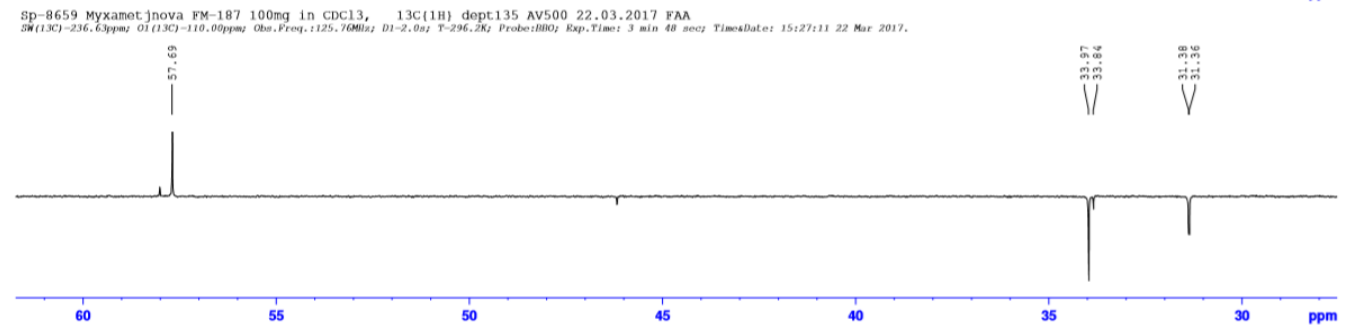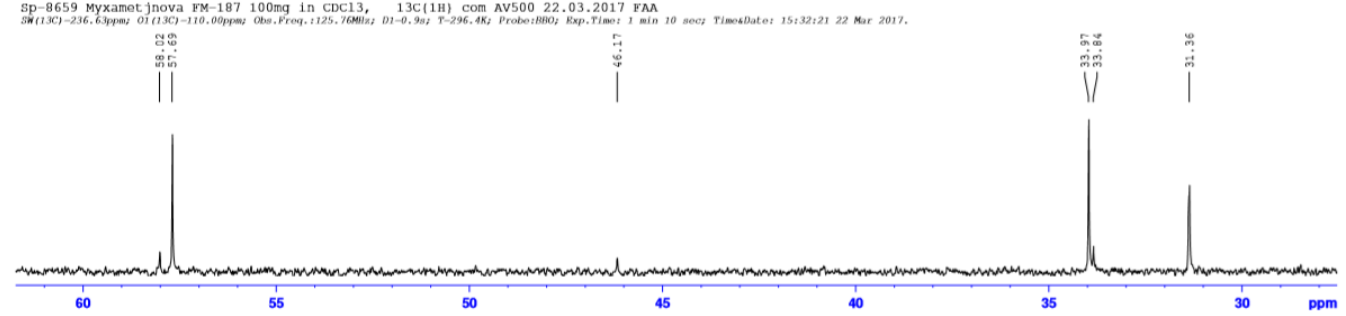

# <sup>1</sup>H NMR – ‘bromoketone Br-K’

Sp-8659 Mykametjnova FM-187 100mg in CDCl<sub>3</sub>, <sup>1</sup>H AV500 22.03.2017 FAA

Ufa Institute of Chemistry of the Russian Academy of Sciences (IIC RAS). 2017

SW(1H)-19.99ppm; O1(1H)-7.00ppm; Obs.Freq.:500.13MHz; D1-2.0s; T-296.0K; Probe:BBG; Exp.Time:44 sec; TimeDate: 15:23:01 22 Mar 2017.

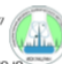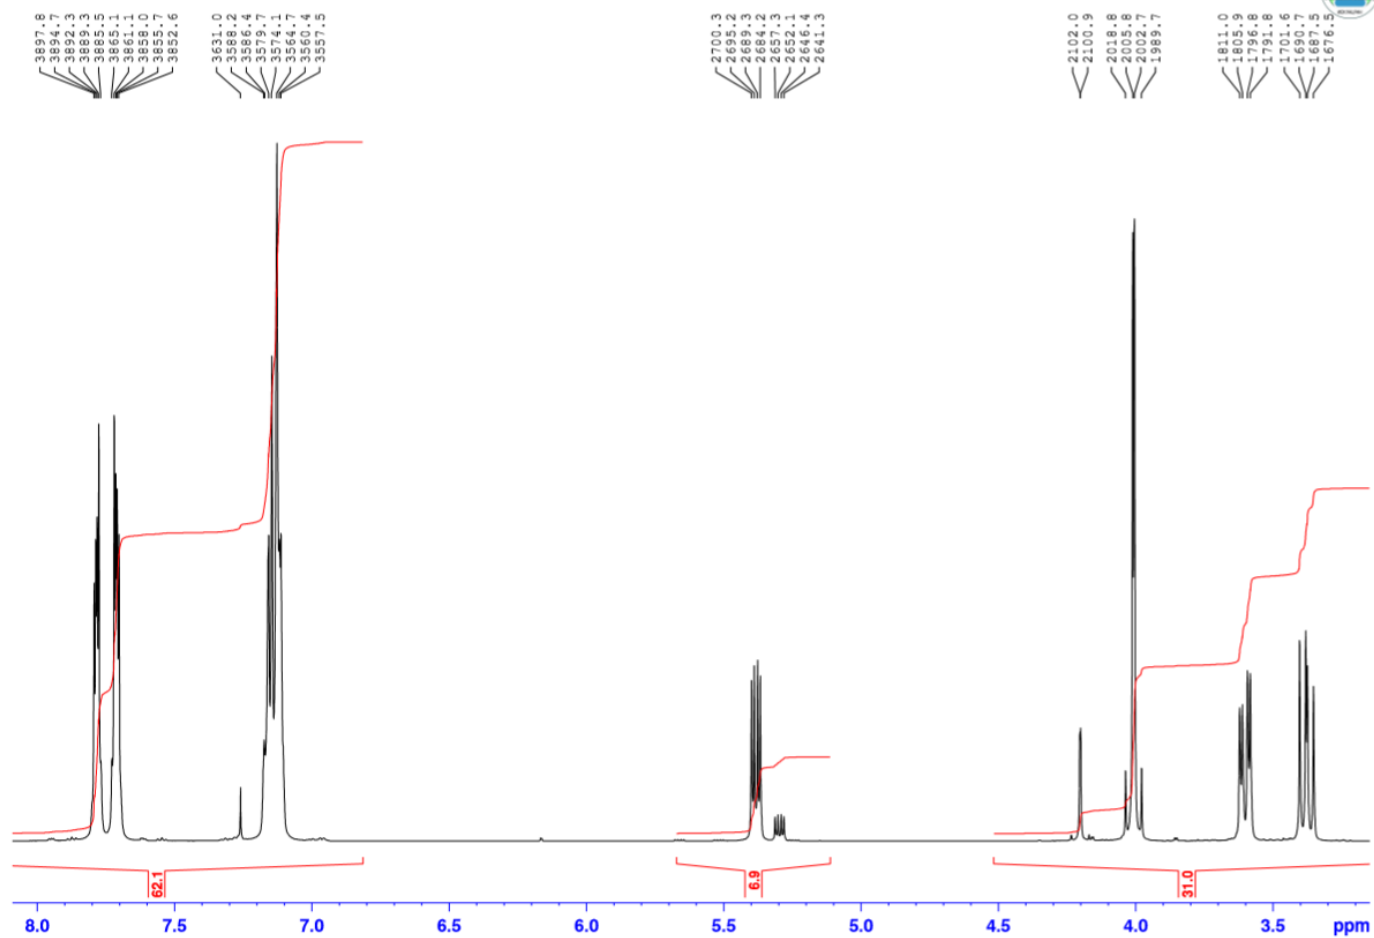

## 1.2. Spectrum data $^1\text{H}$ NMR, $^{13}\text{C}$ NMR and MS-MALDI of mono-adduct MMF and bis-adduct DMF methanofullerenes

### $^{13}\text{C}$ NMR – ‘mono-adduct MMF’

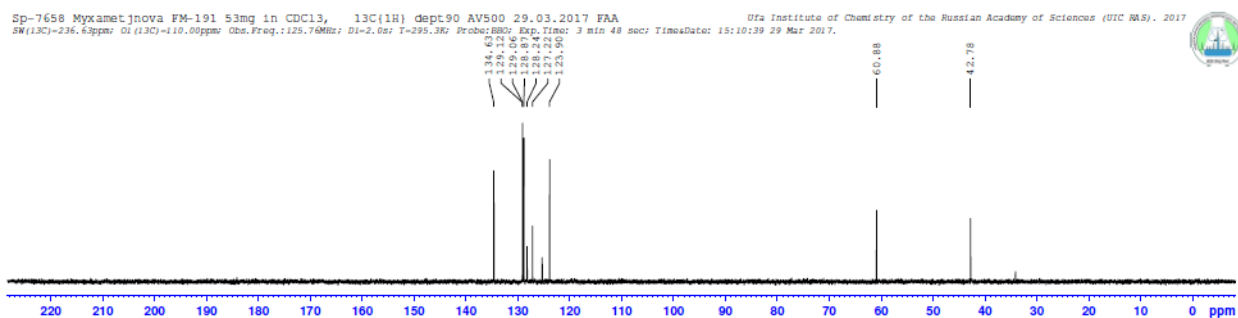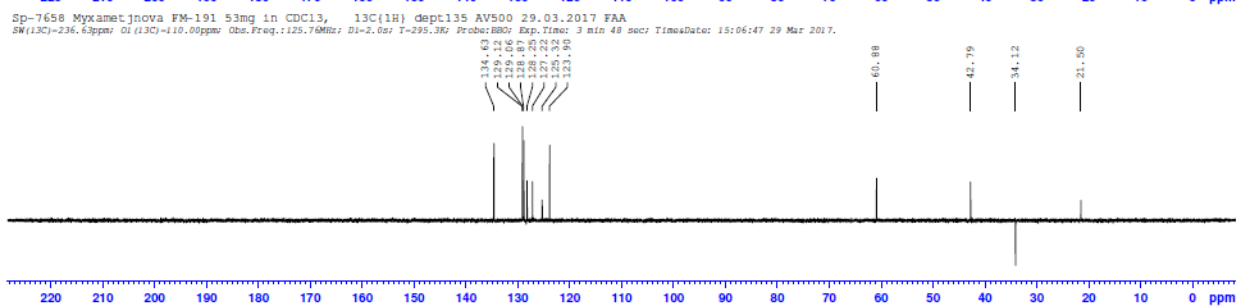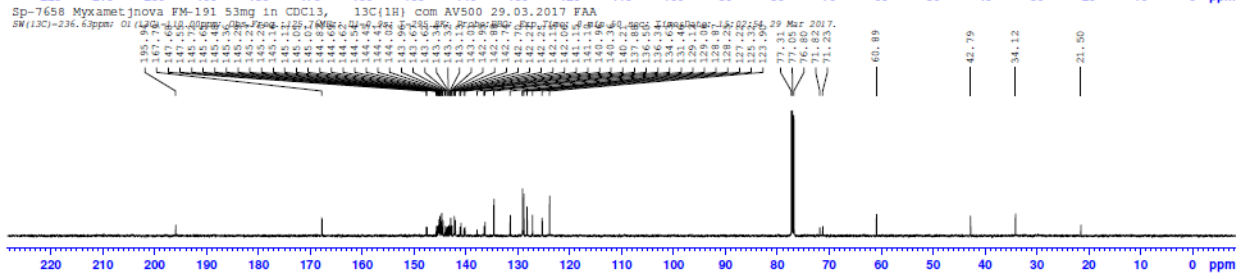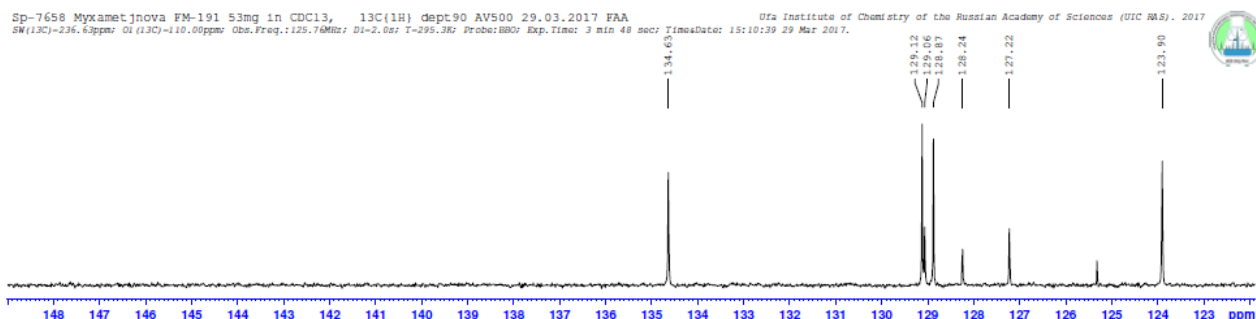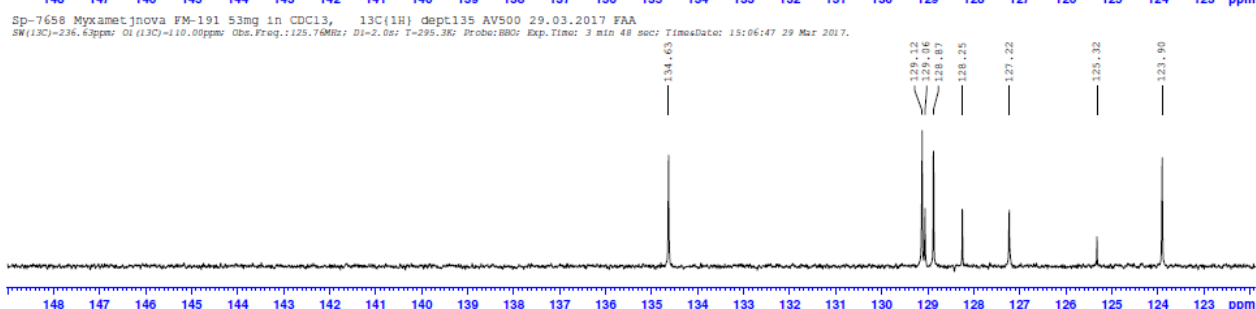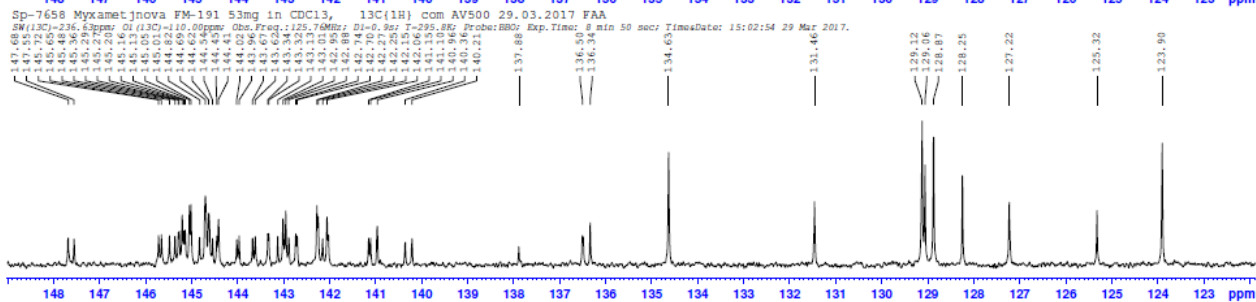



# <sup>1</sup>H NMR – ‘mono-adduct MMF’

Sp-7658 Myxametjnova FM-191 53mg in CDCl<sub>3</sub>, <sup>1</sup>H AV500 29.03.2017 FAA

Ufa Institute of Chemistry of the Russian Academy of Sciences (IIC RAS), 2017

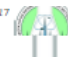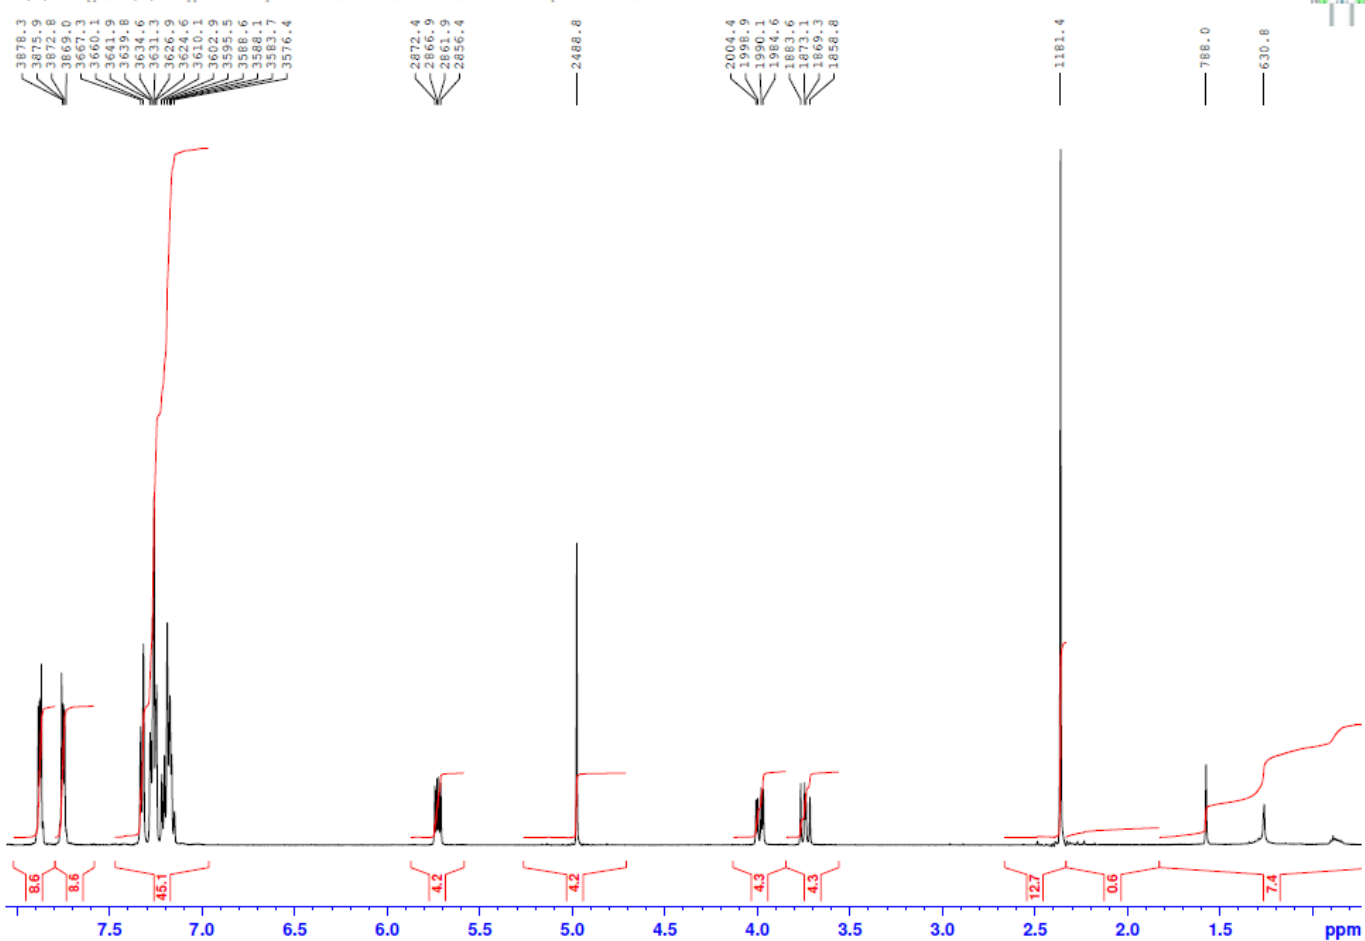

# MS-MALDI – ‘mono-adduct MMF’

Comment 1 3-I S  
 Comment 2 RP

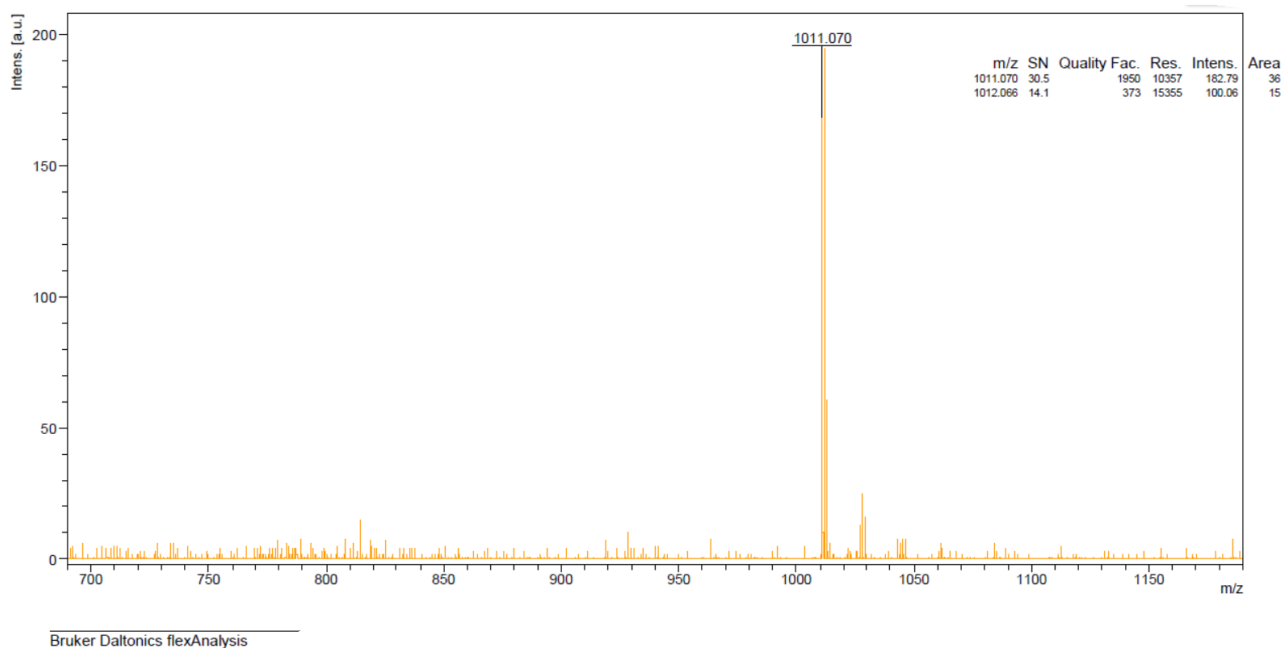



# MS-MALDI – ‘bis-adduct DMF’

Comment 1 3-II S  
Comment 2 RP

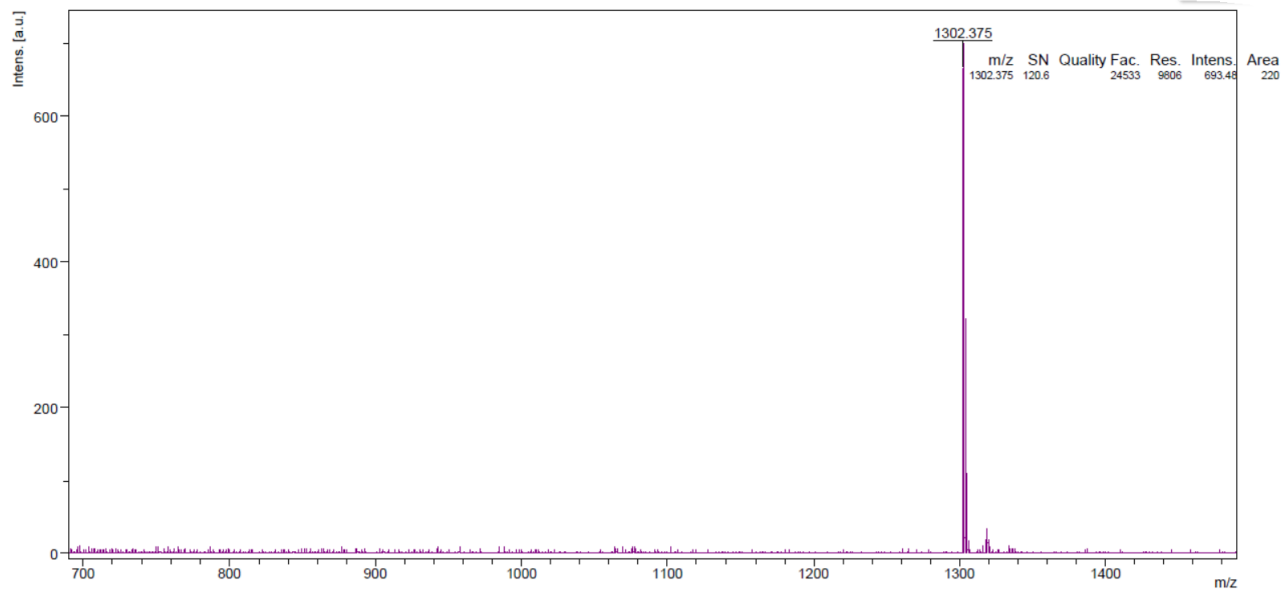

Bruker Daltonics flexAnalysis

## **2. HPLC quantification method**

### **2.1. Optimization of HPLC conditions**

When selecting chromatographic conditions, the acetonitrile and toluene mixtures in reverse phase HPLC in isocratic mode were initially used. The eluents of the toluene/acetonitrile composition were tested in the following volume ratios: 1: 9; 1: 4; 3: 7; 1: 1; 7: 3. It was found that the eluent of the composition toluene/acetonitrile = 1: 1, v/v is optimal, in which the substances obtain good separation and symmetrical peak shapes, but a short retention time. In other systems, poor separation of the test substances was observed, either due to short retention times, where the outgoing detected individual compounds overlap, or the chromatographic peaks had an asymmetric shape.

## 2.2. Linear calibration models for single component

### Absolute grading method for HPLC: peak area vs. concentration plots

Resulting solutions were injected into the column and the peak areas obtained at the retention times 4.98, 2.16 and 1.81 min at a flow rate of 1.0 ml min<sup>-1</sup> in toluene/acetonitrile (1:1, v/v) were measured at a wavelength of 330 nm for C<sub>60</sub>, MMF and DMF, respectively. Calibration plots by plotting peak area vs. concentration were constructed to allow determination of HPLC yields for reactions with different concentrations. Each measurement represented the average of three replicates. Predictable, linear trends were observed in all cases (Fig. S1- S3).

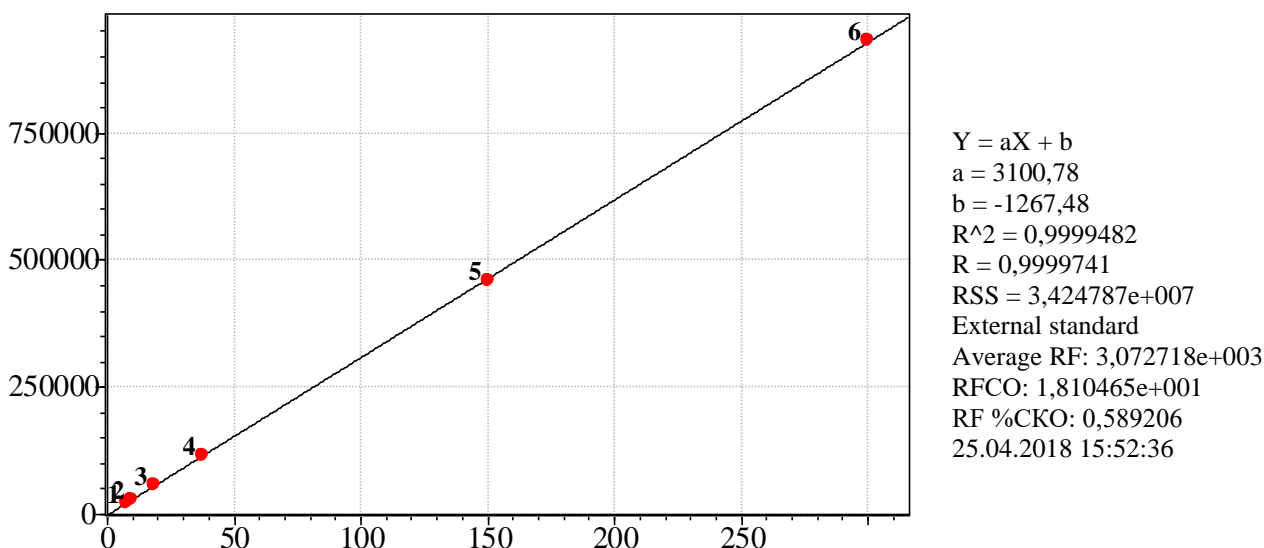

Fig. S1 Peak area vs. concentration plot of C<sub>60</sub>

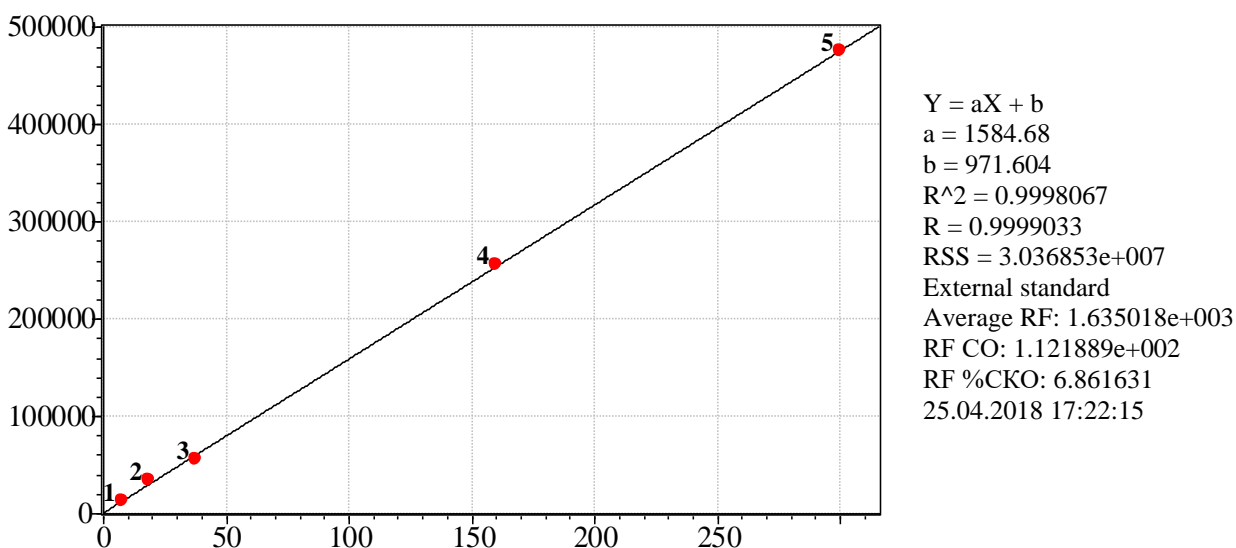

Fig. S2 Peak area vs. concentration plot of MMF

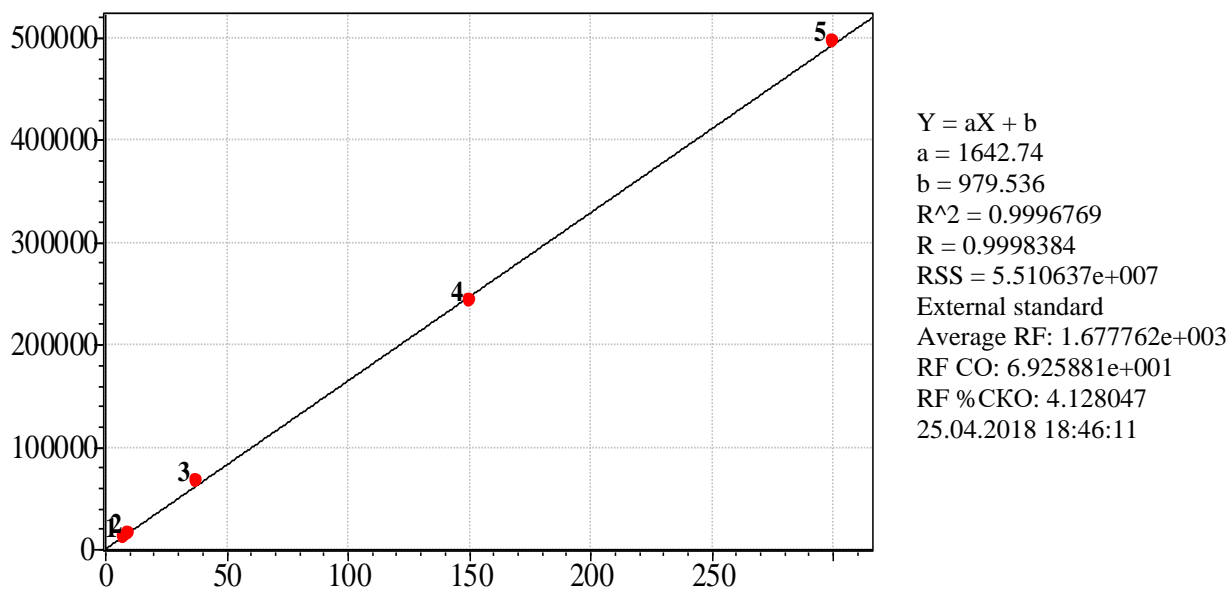

**Fig. S3** Peak area vs. concentration plot of **DMF**

### 2.3. Direct comparison vs. authentic sample

For purposes of quantification it was decided to compare all HPLC chromatograms with the authentic standards at a wavelength of 330 nm (Fig. S4-S6).

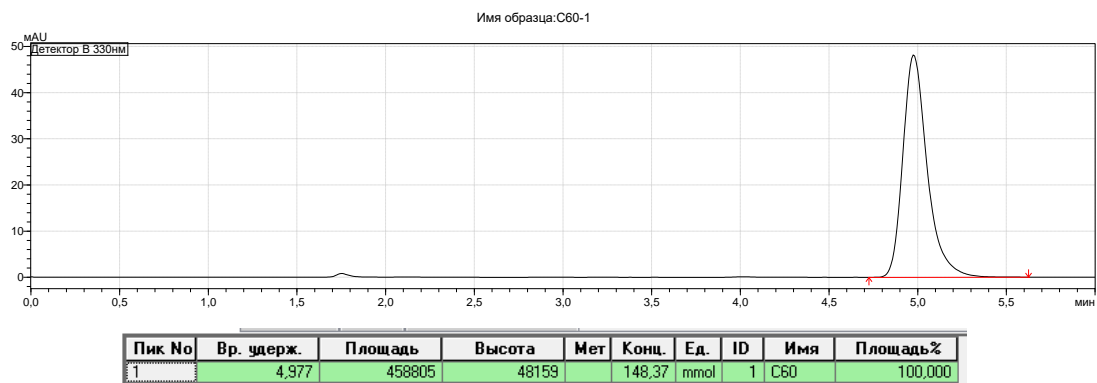

**Fig. S4** HPLC data for C<sub>60</sub> in in toluene/acetonitrile (1:1).

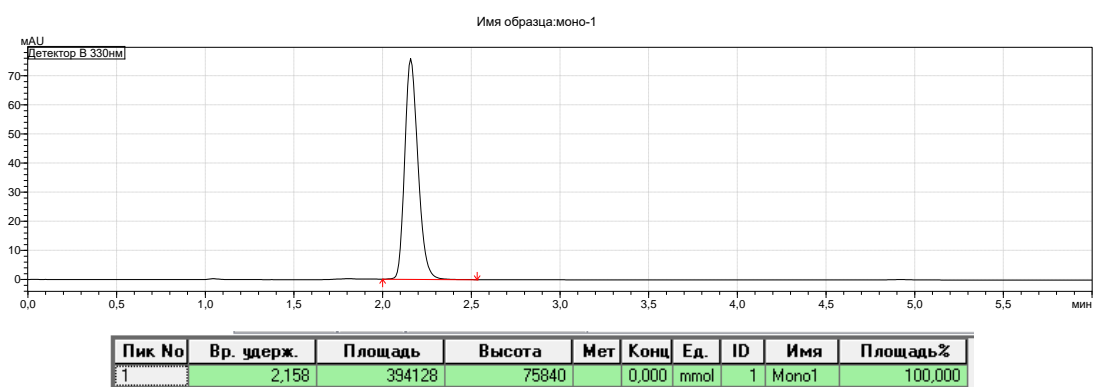

**Fig. S5** HPLC data for MMF in toluene/acetonitrile (1:1).

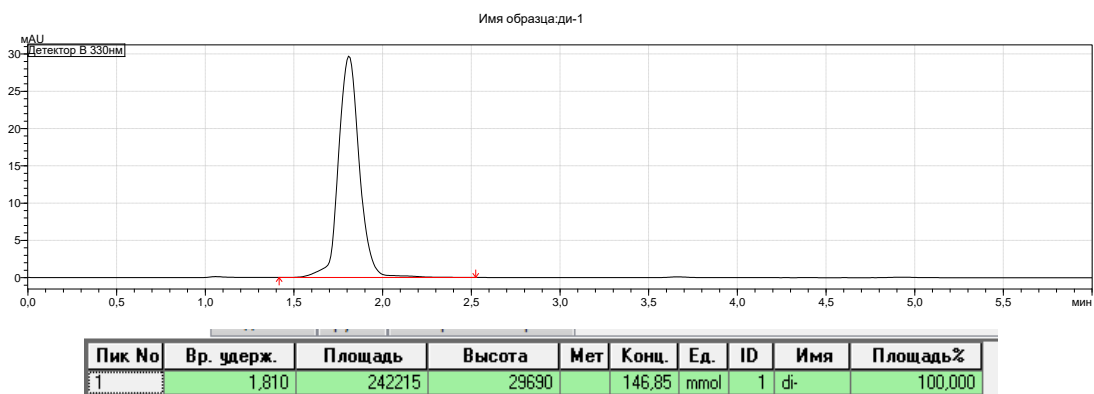

**Fig. S6** HPLC data for DMF in toluene/acetonitrile (1:1).

For an example reaction quantification comparing the peak areas of the chromatograms reveals a yield of returned C<sub>60</sub> (peak at 4.98 min), yield of MMF (peak at 2.16 min) and DMF (peak at 1.81 min) by HPLC in toluene/acetonitrile (1:1) at a wavelength of 330 nm (Fig. S7).

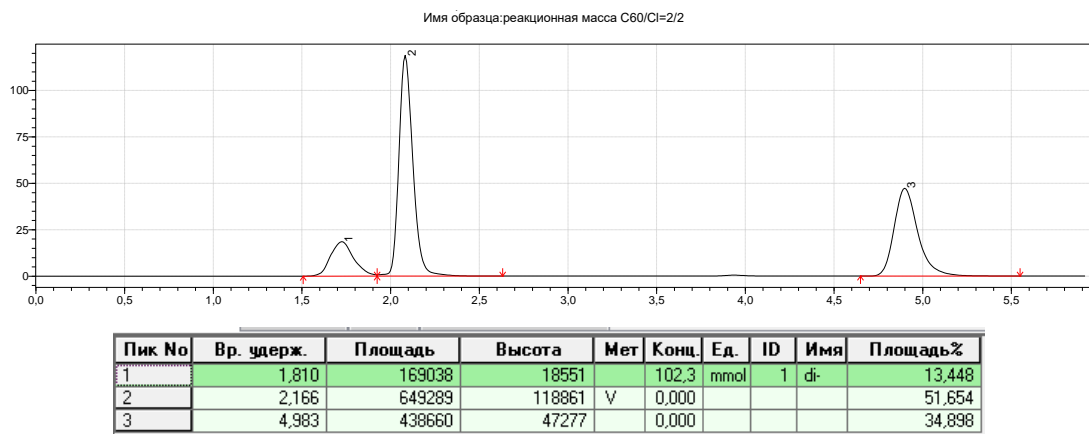

**Fig. S7** HPLC data for the reaction of C<sub>60</sub> with 2-(4-chloro-3-oxo-1-phenylbutan-2-yl)isoindoline-1,3-dione (**Cl-K**) in toluene/acetonitrile (1:1).



### 3. The effect of halogenmethylketones consumption on the kinetic of the process

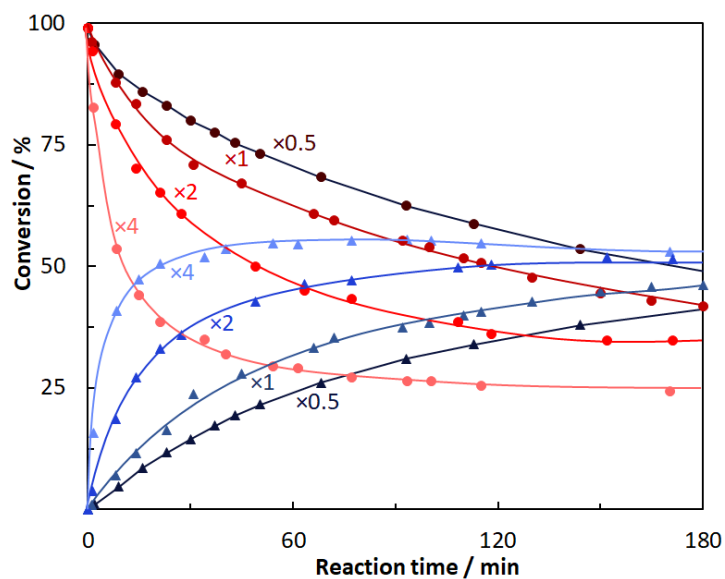

**Fig. S8** Kinetic curves for consumption of fullerene C<sub>60</sub> (●) and accumulation of monoaddition MMF (▲) from the reaction time with (a) 0.5, (b) 1.0, (c) 2.0 and (d) 4.0 equiv. of C<sub>60</sub>: **Cl-K** in the initial mixture at room temperature (294 K).

#### 4. Arrhenius plots of the rate constants

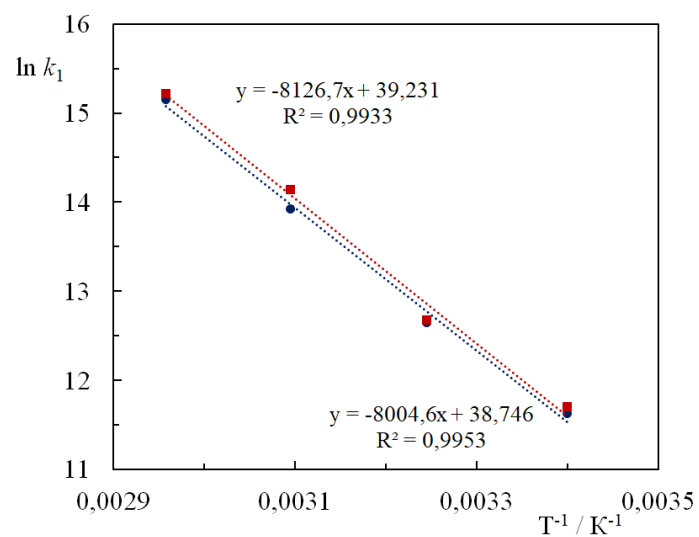

**Fig. S9** Arrhenius plots of the rate constants of the first stage of the Bingel reaction for the equiv. molar ratio  $C_{60} : \text{Cl-K}$  (●) or  $C_{60} : \text{Br-K}$  (■) in the initial mixture.

## 5. The calculation of the reaction rate constant by using the computer algebra system

### MAPLE 16

#### Theoretical Modeling of the Kinetic Process

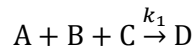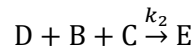

It is known that the concentrations of A(t), B(t), C(t), D(t), E(t) substances satisfy the system of differential equations:

$$\begin{aligned}\frac{dA(t)}{dt} &= -k_1 A(t)B(t)C(t), \\ \frac{dB(t)}{dt} &= -B(t)C(t)(k_1 A(t) + k_2 D(t)), \\ \frac{dC(t)}{dt} &= -B(t)C(t)(k_1 A(t) + k_2 D(t)), \\ \frac{dD(t)}{dt} &= B(t)C(t)(k_1 A(t) - k_2 D(t)), \\ \frac{dE(t)}{dt} &= -k_2 B(t)C(t)D(t),\end{aligned}$$

where  $k_1, k_2$  are the reaction rate coefficients. This system has three simple first integrals (conservation laws)

$$\begin{aligned}B(t) - C(t) &= B_0 - C_0, & A(t) - B(t) - E(t) &= A_0 - B_0 - E_0, \\ A(t) + D(t) + E(t) &= A_0 + D_0 + E_0.\end{aligned}$$

Here  $A_0, B_0, C_0, D_0 = 0, E_0 = 0$  concentration of substances at the initial time. These conservation laws have a simple interpretation - the concentrations of substances B and C vary proportionally. The first integrals allow us to exclude B(t), C(t), D(t) from the system of equations and obtain a system of equations for two unknowns A(t), E(t):

$$\begin{aligned}\frac{dA(t)}{dt} &= -k_1 A(t)(A_0 - C_0 - A(t) + E(t))(A_0 - B_0 - A(t) + E(t)), \\ \frac{dE(t)}{dt} &= -k_2 (A_0 - C_0 - A(t) + E(t))(A_0 - B_0 - A(t) + E(t))(A_0 - A(t) - E(t)).\end{aligned}$$

This system has a nontrivial first integral

$$W(t) = \frac{1}{A_0} \left( kA(t) - (k-1)(A_0 - E(t)) \right) \left( \frac{A(t)}{A_0} \right)^{-k} - 1,$$

where  $k$  is the ratio  $k_2/k_1$ . The value of this integral is 0. Knowing the experimental dependences of A(t), E(t) curves, we a minimizing functional for finding  $k$  can be composed

$$f(k) = \sum_{i=1}^N W^2(t_i, k) \rightarrow \min$$

$k$  values are found from the derivative to be equal to zero

$$f'(k) = 0$$

From  $W(t) = 0$ ,  $E(t)$  can be expressed

$$E(t) = \frac{A_0}{k-1} \left( \left( \frac{A(t)}{A_0} \right)^{-k} - k \frac{A(t)}{A_0} + k - 1 \right)$$

and a differential equation for  $A(t)$  function is obtained:

$$\frac{dA(t)}{dt} = -\frac{k_1}{(k-1)^2} A(t) A_0^2 \left( \left( \frac{A(t)}{A_0} \right)^{-k} + (k-1) \left( 2 - \frac{C_0}{A_0} \right) + (1-2k) \frac{A(t)}{A_0} \right) \left( \left( \frac{A(t)}{A_0} \right)^{-k} + (k-1) \left( 2 - \frac{B_0}{A_0} \right) + (1-2k) \frac{A(t)}{A_0} \right).$$

For a given  $k_1$  value, this equation can be solved by the Runge-Kutta method and the results of numerical calculations are to be compared with the experimental data. Using the golden section method, such a  $k_1$  value is determined when the solution deviation will be minimal.

So, Fig. S10-S11 reveals the kinetic curves obtained during the experiment (squares) and after a mathematical modeling (solid line) implemented in MAPLE. Good convergence between the two representations of the kinetic data is observed.

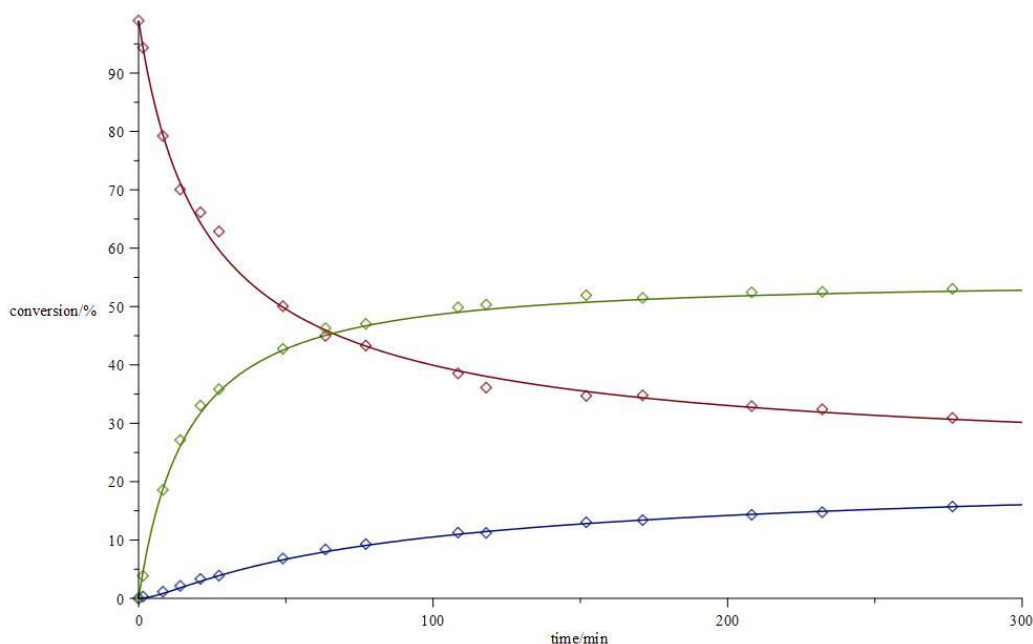

**Fig. S10** Kinetic curves decrease of fullerene  $C_{60}$  and increase of **MMF** and **DMF** from reaction time at molar ratio of reagents in the initial mixture  $C_{60}$ : **Cl-K** = 1:2. Squares represent the observed experimental concentrations during the reaction time. Solid line is the result of theoretical mathematical modeling.

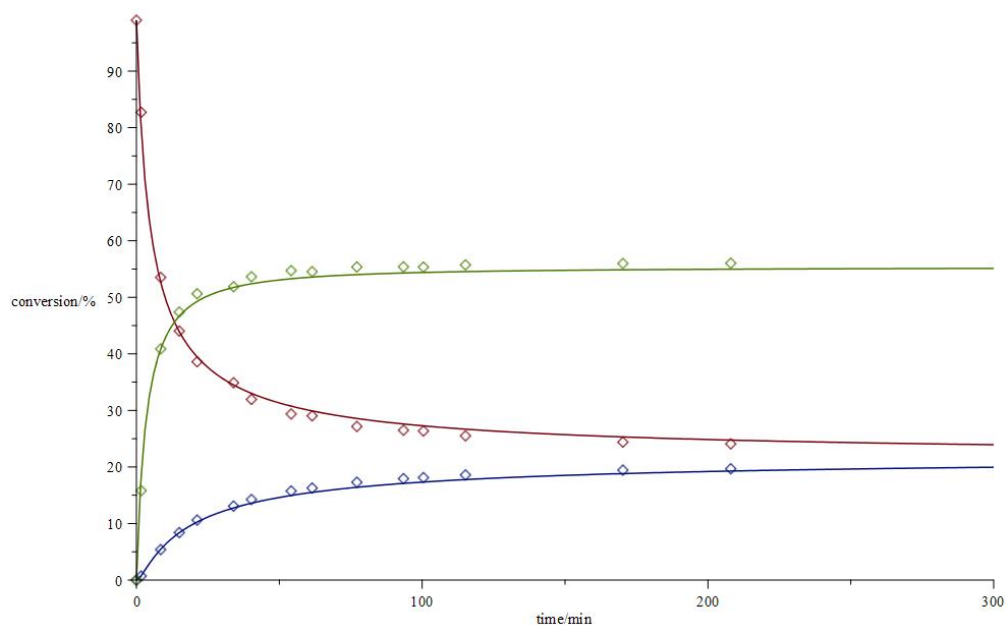

**Fig. S11** Kinetic curves decrease of fullerene  $C_{60}$  and increase of **MMF** and **DMF** from reaction time at molar ratio of reagents in the initial mixture  $C_{60}$ : **Cl-K** = 1:4. Squares represent the observed experimental concentrations during the reaction time. Solid line is the result of theoretical mathematical modeling.

## 6. List of Cartesian coordinates for the optimized structures

1 – H; 6 – C; 7 - N; 8 - O; 17 - Cl; 35 – Br.

B3LYP/6-31G(d), toluene

|                                            |              |              |              |    |              |                           |
|--------------------------------------------|--------------|--------------|--------------|----|--------------|---------------------------|
| <b>C<sub>60</sub></b> = -2285.89729 Хартри |              |              |              |    |              |                           |
| 6                                          | 0.729729000  | -1.004386000 | 3.338076000  | 6  | 2.609312000  | 2.349921000 -0.594483000  |
| 6                                          | 1.180727000  | 0.383641000  | 3.338076000  | 6  | 1.428585000  | 3.207769000 -0.594483000  |
| 6                                          | 0.000000000  | 1.241490000  | 3.338076000  | 6  | 0.729729000  | 3.434841000 0.594483000   |
| 6                                          | -1.180727000 | 0.383641000  | 3.338076000  | 6  | -0.729729000 | 3.434841000 0.594483000   |
| 6                                          | -0.729729000 | -1.004386000 | 3.338076000  | 6  | -1.428585000 | 3.207769000 -0.594483000  |
| 6                                          | -1.428585000 | -1.966279000 | 2.603255000  | 6  | -2.609312000 | 2.349921000 -0.594483000  |
| 6                                          | -0.698856000 | -2.970665000 | 1.835972000  | 6  | -3.041229000 | 1.755438000 0.594483000   |
| 6                                          | 0.698856000  | -2.970665000 | 1.835972000  | 6  | -3.492227000 | 0.367410000 0.594483000   |
| 6                                          | 1.428585000  | -1.966279000 | 2.603255000  | 6  | -3.492227000 | -0.367410000 -0.594483000 |
| 6                                          | 2.609312000  | -1.582638000 | 1.835972000  | 6  | -3.041229000 | -1.755438000 -0.594483000 |
| 6                                          | 3.041229000  | -0.253334000 | 1.835972000  | 6  | -2.311500000 | -1.992541000 -1.835972000 |
| 6                                          | 2.311500000  | 0.751052000  | 2.603255000  | 6  | -1.180727000 | -2.814096000 -1.835972000 |
| 6                                          | 2.311500000  | 1.992541000  | 1.835972000  | 6  | 0.000000000  | -2.430455000 -2.603255000 |
| 6                                          | 1.180727000  | 2.814096000  | 1.835972000  | 6  | 1.180727000  | -2.814096000 -1.835972000 |
| 6                                          | 0.000000000  | 2.430455000  | 2.603255000  | 6  | 2.311500000  | -1.992541000 -1.835972000 |
| 6                                          | -1.180727000 | 2.814096000  | 1.835972000  | 6  | 2.311500000  | -0.751052000 -2.603255000 |
| 6                                          | -2.311500000 | 1.992541000  | 1.835972000  | 6  | 3.041229000  | 0.253334000 -1.835972000  |
| 6                                          | -2.311500000 | 0.751052000  | 2.603255000  | 6  | 2.609312000  | 1.582638000 -1.835972000  |
| 6                                          | -3.041229000 | -0.253334000 | 1.835972000  | 6  | 1.428585000  | 1.966279000 -2.603255000  |
| 6                                          | -2.609312000 | -1.582638000 | 1.835972000  | 6  | 0.698856000  | 2.970665000 -1.835972000  |
| 6                                          | -2.609312000 | -2.349921000 | 0.594483000  | 6  | -0.698856000 | 2.970665000 -1.835972000  |
| 6                                          | -1.428585000 | -3.207769000 | 0.594483000  | 6  | -1.428585000 | 1.966279000 -2.603255000  |
| 6                                          | -0.729729000 | -3.434841000 | -0.594483000 | 6  | -2.609312000 | 1.582638000 -1.835972000  |
| 6                                          | 0.729729000  | -3.434841000 | -0.594483000 | 6  | -3.041229000 | 0.253334000 -1.835972000  |
| 6                                          | 1.428585000  | -3.207769000 | 0.594483000  | 6  | -2.311500000 | -0.751052000 -2.603255000 |
| 6                                          | 2.609312000  | -2.349921000 | 0.594483000  | 6  | -1.180727000 | -0.383641000 -3.338076000 |
| 6                                          | 3.041229000  | -1.755438000 | -0.594483000 | 6  | 0.000000000  | -1.241490000 -3.338076000 |
| 6                                          | 3.492227000  | -0.367410000 | -0.594483000 | 6  | 1.180727000  | -0.383641000 -3.338076000 |
| 6                                          | 3.492227000  | 0.367410000  | 0.594483000  | 6  | 0.729729000  | 1.004386000 -3.338076000  |
| 6                                          | 3.041229000  | 1.755438000  | 0.594483000  | 6  | -0.729729000 | 1.004386000 -3.338076000  |
| <b>Cl-K<sup>-</sup></b> = -1434.24674      |              |              |              |    |              |                           |
| 6                                          | 3.104227000  | 0.292827000  | 0.330221000  | 6  | -0.840903000 | 1.498545000 -1.018937000  |
| 6                                          | 2.597514000  | -0.869061000 | -0.243798000 | 6  | -1.792290000 | 2.480498000 -1.227142000  |
| 6                                          | 4.469838000  | 0.520710000  | 0.430665000  | 1  | -1.193932000 | 0.060821000 2.229232000   |
| 6                                          | 3.436834000  | -1.858782000 | -0.734740000 | 17 | -2.520354000 | 3.488060000 0.084999000   |
| 6                                          | 5.327119000  | -0.466604000 | -0.071672000 | 8  | -0.203912000 | 0.920620000 -1.945997000  |
| 6                                          | 4.817553000  | -1.639148000 | -0.645554000 | 6  | -2.317885000 | -0.905309000 0.688173000  |
| 1                                          | 4.854144000  | 1.431987000  | 0.879658000  | 6  | -2.247348000 | -2.128761000 1.367863000  |
| 1                                          | 3.032046000  | -2.764797000 | -1.175977000 | 6  | -3.129033000 | -0.832886000 -0.454664000 |
| 1                                          | 6.403132000  | -0.323280000 | -0.016741000 | 6  | -2.946977000 | -3.250561000 0.920534000  |
| 1                                          | 5.506270000  | -2.388164000 | -1.027748000 | 6  | -3.826050000 | -1.952961000 -0.908419000 |
| 6                                          | 1.946422000  | 1.131962000  | 0.756367000  | 6  | -3.740462000 | -3.168042000 -0.224535000 |
| 6                                          | 1.101654000  | -0.820385000 | -0.169161000 | 1  | -1.629069000 | -2.205272000 2.260438000  |
| 7                                          | 0.788121000  | 0.401122000  | 0.464697000  | 1  | -2.869357000 | -4.188392000 1.466795000  |
| 8                                          | 1.986393000  | 2.237365000  | 1.270641000  | 1  | -4.443209000 | -1.872857000 -1.800721000 |
| 8                                          | 0.339646000  | -1.710660000 | -0.480601000 | 1  | -4.288238000 | -4.038656000 -0.578543000 |
| 6                                          | -0.518406000 | 1.070875000  | 0.456711000  | 1  | -2.001900000 | 2.890677000 -2.206131000  |
| 6                                          | -1.622747000 | 0.320693000  | 1.252084000  | 1  | -3.205772000 | 0.110785000 -0.987707000  |
| <b>Br-K<sup>-</sup></b> = -3545.76082      |              |              |              |    |              |                           |
| 6                                          | 3.406163000  | -0.600467000 | -0.268331000 | 6  | -1.750159000 | -1.697834000 1.305792000  |

|                                   |              |              |              |    |              |              |              |
|-----------------------------------|--------------|--------------|--------------|----|--------------|--------------|--------------|
| 6                                 | 3.144680000  | 0.704066000  | 0.139277000  | 1  | -0.661875000 | 0.639768000  | -2.182044000 |
| 6                                 | 4.693416000  | -1.119613000 | -0.266188000 | 8  | 0.060180000  | -0.351225000 | 1.919048000  |
| 6                                 | 4.161419000  | 1.548348000  | 0.561784000  | 6  | -1.908212000 | 1.517128000  | -0.672792000 |
| 6                                 | 5.727212000  | -0.279994000 | 0.168354000  | 6  | -1.594737000 | 2.818870000  | -1.086044000 |
| 6                                 | 5.464513000  | 1.034025000  | 0.577925000  | 6  | -2.955239000 | 1.351209000  | 0.247776000  |
| 1                                 | 4.886638000  | -2.139422000 | -0.585915000 | 6  | -2.291519000 | 3.923392000  | -0.594622000 |
| 1                                 | 3.947589000  | 2.566074000  | 0.874686000  | 6  | -3.648061000 | 2.454343000  | 0.749570000  |
| 1                                 | 6.748238000  | -0.651847000 | 0.190720000  | 6  | -3.322299000 | 3.745681000  | 0.330316000  |
| 1                                 | 6.285776000  | 1.662040000  | 0.913489000  | 1  | -0.786122000 | 2.967447000  | -1.796929000 |
| 6                                 | 2.106314000  | -1.225875000 | -0.652354000 | 1  | -2.025637000 | 4.923116000  | -0.931865000 |
| 6                                 | 1.677075000  | 0.960554000  | -0.016286000 | 1  | -4.452068000 | 2.300606000  | 1.466173000  |
| 7                                 | 1.124370000  | -0.236870000 | -0.509662000 | 1  | -3.867358000 | 4.603809000  | 0.717830000  |
| 8                                 | 1.921804000  | -2.370057000 | -1.031404000 | 1  | -2.085364000 | -1.940394000 | 2.304539000  |
| 8                                 | 1.116611000  | 2.027604000  | 0.130471000  | 1  | -3.218103000 | 0.348407000  | 0.568249000  |
| 6                                 | -0.293311000 | -0.618520000 | -0.466175000 | 1  | -2.020848000 | -0.346274000 | -1.664997000 |
| 6                                 | -1.226083000 | 0.313724000  | -1.299441000 | 1  | -0.311683000 | -1.580079000 | -0.984382000 |
| 6                                 | -0.672282000 | -0.880595000 | 1.033082000  | 35 | -2.840339000 | -2.566754000 | -0.063334000 |
| <b>MMF-Int(CI) = -3720.164852</b> |              |              |              |    |              |              |              |
| 6                                 | -0.635463000 | -0.027043000 | 1.863575000  | 6  | 4.088253000  | 2.847061000  | -0.711216000 |
| 6                                 | -1.139354000 | 1.066041000  | 0.888156000  | 6  | 4.667667000  | 1.953210000  | -1.698329000 |
| 6                                 | -1.116055000 | 0.268396000  | -0.447913000 | 6  | 3.664797000  | 1.713609000  | -2.727762000 |
| 6                                 | -0.981505000 | -1.137712000 | -0.179795000 | 6  | 3.573535000  | 0.449668000  | -3.328659000 |
| 6                                 | -0.683320000 | -1.317316000 | 1.231218000  | 6  | 4.451438000  | -0.620942000 | -2.892371000 |
| 6                                 | 0.141493000  | -2.373391000 | 1.640127000  | 6  | 3.694500000  | -1.865108000 | -2.892908000 |
| 6                                 | 1.126640000  | -2.135657000 | 2.664195000  | 6  | 3.920958000  | -2.822766000 | -1.899173000 |
| 6                                 | 1.229105000  | -0.861739000 | 3.236578000  | 6  | 4.917606000  | -2.586627000 | -0.869296000 |
| 6                                 | 0.341161000  | 0.207947000  | 2.819342000  | 6  | 5.635490000  | -1.385379000 | -0.866457000 |
| 6                                 | 1.098990000  | 1.466775000  | 2.856695000  | 6  | 5.893905000  | -0.687401000 | 0.380146000  |
| 6                                 | 0.876199000  | 2.383646000  | 1.811801000  | 6  | 5.817243000  | 0.741717000  | 0.118641000  |
| 6                                 | -0.130243000 | 2.208116000  | 0.820108000  | 6  | 5.516677000  | 0.923311000  | -1.292304000 |
| 6                                 | 0.400179000  | 2.669576000  | -0.414774000 | 6  | 5.409970000  | -0.392917000 | -1.901828000 |
| 6                                 | 0.138923000  | 2.052107000  | -1.657582000 | 6  | -2.591763000 | 1.601253000  | 1.163790000  |
| 6                                 | -0.594716000 | 0.781910000  | -1.626284000 | 6  | -3.681895000 | 0.524522000  | 1.077513000  |
| 6                                 | -0.006601000 | -0.108026000 | -2.610898000 | 6  | -4.697688000 | 0.647532000  | -0.084278000 |
| 6                                 | 0.061374000  | -1.485608000 | -2.370046000 | 8  | -3.722657000 | -0.404997000 | 1.853152000  |
| 6                                 | -0.444592000 | -2.017256000 | -1.129707000 | 7  | -5.489917000 | -0.571067000 | -0.163100000 |
| 6                                 | 0.439523000  | -3.093587000 | -0.703409000 | 6  | -5.605010000 | 1.917014000  | -0.011915000 |
| 6                                 | 0.725649000  | -3.267159000 | 0.648055000  | 6  | -5.009096000 | 3.184093000  | -0.595342000 |
| 6                                 | 2.079604000  | -3.576408000 | 1.071147000  | 6  | -4.887567000 | 4.341724000  | 0.184662000  |
| 6                                 | 2.326618000  | -2.876671000 | 2.322679000  | 6  | -4.609270000 | 3.239812000  | -1.940054000 |
| 6                                 | 3.582799000  | -2.313920000 | 2.564278000  | 6  | -4.370918000 | 5.520697000  | -0.357905000 |
| 6                                 | 3.690045000  | -0.995644000 | 3.173804000  | 6  | -4.090656000 | 4.414462000  | -2.483607000 |
| 6                                 | 2.529653000  | -0.285777000 | 3.494242000  | 6  | -3.968936000 | 5.559998000  | -1.692975000 |
| 6                                 | 2.444961000  | 1.150243000  | 3.241572000  | 1  | -5.193532000 | 4.317586000  | 1.227524000  |
| 6                                 | 3.553677000  | 1.812718000  | 2.675644000  | 1  | -4.703840000 | 2.356696000  | -2.568523000 |
| 6                                 | 3.320648000  | 2.795592000  | 1.635740000  | 1  | -4.277007000 | 6.404627000  | 0.267571000  |
| 6                                 | 2.020059000  | 3.079299000  | 1.217911000  | 1  | -3.780245000 | 4.434776000  | -3.524968000 |
| 6                                 | 1.722297000  | 3.260101000  | -0.179238000 | 1  | -3.559131000 | 6.473895000  | -2.114862000 |
| 6                                 | 2.730875000  | 3.149851000  | -1.135672000 | 6  | -5.263260000 | -1.551803000 | -1.146089000 |
| 6                                 | 2.479476000  | 2.467090000  | -2.391070000 | 6  | -6.452122000 | -0.982367000 | 0.777669000  |
| 6                                 | 1.204762000  | 1.904660000  | -2.608357000 | 6  | -6.164846000 | -2.687942000 | -0.804605000 |
| 6                                 | 1.108889000  | 0.580201000  | -3.218653000 | 6  | -6.874851000 | -2.348876000 | 0.348203000  |
| 6                                 | 2.263506000  | -0.126164000 | -3.566956000 | 6  | -6.355539000 | -3.903908000 | -1.444968000 |
| 6                                 | 2.339922000  | -1.557471000 | -3.307483000 | 6  | -7.804926000 | -3.213973000 | 0.906255000  |
| 6                                 | 1.258315000  | -2.224647000 | -2.726154000 | 6  | -7.289862000 | -4.786039000 | -0.886959000 |
| 6                                 | 1.493806000  | -3.221913000 | -1.693274000 | 6  | -8.003068000 | -4.446425000 | 0.269782000  |
| 6                                 | 2.798889000  | -3.514901000 | -1.288698000 | 1  | -5.797682000 | -4.159495000 | -2.340615000 |
| 6                                 | 3.098267000  | -3.697844000 | 0.122129000  | 1  | -8.353220000 | -2.944549000 | 1.803791000  |

|                                   |              |              |              |    |              |              |              |
|-----------------------------------|--------------|--------------|--------------|----|--------------|--------------|--------------|
| 6                                 | 4.404264000  | -3.117025000 | 0.381104000  | 1  | -7.463765000 | -5.749547000 | -1.357744000 |
| 6                                 | 4.642471000  | -2.443002000 | 1.583376000  | 1  | -8.720030000 | -5.152029000 | 0.680142000  |
| 6                                 | 5.397837000  | -1.198324000 | 1.581883000  | 8  | -4.490663000 | -1.442521000 | -2.078238000 |
| 6                                 | 4.823344000  | -0.312589000 | 2.578286000  | 8  | -6.865263000 | -0.322775000 | 1.710657000  |
| 6                                 | 4.735696000  | 1.062178000  | 2.319362000  | 1  | -4.120937000 | 0.675001000  | -1.015556000 |
| 6                                 | 5.254304000  | 1.596070000  | 1.066940000  | 1  | -6.511447000 | 1.662926000  | -0.574587000 |
| 6                                 | 4.375745000  | 2.671943000  | 0.643670000  | 1  | -5.922457000 | 2.083981000  | 1.020068000  |
|                                   |              |              |              | 1  | -2.784884000 | 2.405233000  | 0.454798000  |
|                                   |              |              |              | 17 | -2.712179000 | 2.393027000  | 2.807543000  |
| <b>MMF-Int(Br) = -5831.682248</b> |              |              |              |    |              |              |              |
| 6                                 | 0.516728000  | -0.284615000 | -1.643150000 | 6  | 5.504974000  | 1.819680000  | -0.069642000 |
| 6                                 | 1.027459000  | 0.799438000  | -0.660411000 | 6  | 5.058366000  | 2.998079000  | 0.776249000  |
| 6                                 | 0.879600000  | 0.034078000  | 0.687854000  | 6  | 4.428770000  | 4.108760000  | 0.198624000  |
| 6                                 | 0.675203000  | -1.366758000 | 0.439779000  | 6  | -4.853774000 | 2.090032000  | 1.567677000  |
| 6                                 | 0.447971000  | -1.560330000 | -0.982414000 | 6  | -3.926848000 | 1.814875000  | 2.657853000  |
| 6                                 | -0.415148000 | -2.573995000 | -1.417445000 | 6  | -3.945928000 | 0.561276000  | 3.286352000  |
| 6                                 | -1.324846000 | -2.301796000 | -2.501407000 | 6  | -4.861328000 | -0.464629000 | 2.821268000  |
| 6                                 | -1.317235000 | -1.037145000 | -3.102553000 | 6  | -4.183276000 | -1.751859000 | 2.891684000  |
| 6                                 | -0.390607000 | -0.013263000 | -2.655163000 | 6  | -4.409511000 | -2.715759000 | 1.904186000  |
| 6                                 | -1.067359000 | 1.288326000  | -2.763676000 | 6  | -5.329542000 | -2.444020000 | 0.814199000  |
| 6                                 | -0.851836000 | 2.211451000  | -1.723470000 | 6  | -5.973953000 | -1.203545000 | 0.747407000  |
| 6                                 | 0.086594000  | 2.003169000  | -0.673399000 | 6  | -6.116915000 | -0.520424000 | -0.525821000 |
| 6                                 | -0.485041000 | 2.521313000  | 0.519054000  | 6  | -5.968908000 | 0.907275000  | -0.288699000 |
| 6                                 | -0.331558000 | 1.917839000  | 1.786793000  | 6  | -5.739733000 | 1.103550000  | 1.133573000  |
| 6                                 | 0.324392000  | 0.606245000  | 1.822813000  | 6  | -5.748646000 | -0.202436000 | 1.774676000  |
| 6                                 | -0.371860000 | -0.224505000 | 2.788611000  | 6  | 2.509203000  | 1.248996000  | -0.833259000 |
| 6                                 | -0.508991000 | -1.601052000 | 2.572317000  | 6  | 3.584438000  | 0.165903000  | -0.719827000 |
| 6                                 | 0.033803000  | -2.191139000 | 1.374098000  | 6  | 4.767219000  | 0.471932000  | 0.231259000  |
| 6                                 | -0.887815000 | -3.223380000 | 0.918742000  | 8  | 3.505575000  | -0.890539000 | -1.307338000 |
| 6                                 | -1.106728000 | -3.409840000 | -0.444022000 | 7  | 5.676533000  | -0.662108000 | 0.250681000  |
| 6                                 | -2.451060000 | -3.646678000 | -0.938132000 | 6  | 5.299193000  | 3.010769000  | 2.159269000  |
| 6                                 | -2.584659000 | -2.962816000 | -2.215832000 | 6  | 4.048803000  | 5.202651000  | 0.980689000  |
| 6                                 | -3.788925000 | -2.331465000 | -2.539807000 | 6  | 4.921369000  | 4.101122000  | 2.941655000  |
| 6                                 | -3.781411000 | -1.023615000 | -3.178731000 | 6  | 4.296113000  | 5.203752000  | 2.353170000  |
| 6                                 | -2.563935000 | -0.391368000 | -3.444555000 | 1  | 4.208742000  | 4.103803000  | -0.865841000 |
| 6                                 | -2.407095000 | 1.041686000  | -3.215536000 | 1  | 5.787485000  | 2.158135000  | 2.627225000  |
| 6                                 | -3.504253000 | 1.783103000  | -2.730891000 | 1  | 3.554508000  | 6.050495000  | 0.513645000  |
| 6                                 | -3.271367000 | 2.771969000  | -1.697353000 | 1  | 5.115893000  | 4.090826000  | 4.011123000  |
| 6                                 | -1.981504000 | 2.990317000  | -1.212493000 | 1  | 3.999031000  | 6.053293000  | 2.962498000  |
| 6                                 | -1.753859000 | 3.183628000  | 0.196211000  | 6  | 5.730951000  | -1.576759000 | 1.316441000  |
| 6                                 | -2.819967000 | 3.156362000  | 1.094238000  | 6  | 6.474584000  | -1.069083000 | -0.833493000 |
| 6                                 | -2.680859000 | 2.489160000  | 2.375830000  | 6  | 6.664809000  | -2.654002000 | 0.881076000  |
| 6                                 | -1.456894000 | 1.856203000  | 2.676343000  | 6  | 7.106861000  | -2.352985000 | -0.408386000 |
| 6                                 | -1.476050000 | 0.543030000  | 3.316385000  | 6  | 7.094408000  | -3.791197000 | 1.549619000  |
| 6                                 | -2.689171000 | -0.085319000 | 3.610180000  | 6  | 7.996311000  | -3.178327000 | -1.080756000 |
| 6                                 | -2.837400000 | -1.514563000 | 3.375478000  | 6  | 7.990228000  | -4.633271000 | 0.877746000  |
| 6                                 | -1.767321000 | -2.258701000 | 2.872235000  | 6  | 8.433434000  | -4.331940000 | -0.416371000 |
| 6                                 | -2.004147000 | -3.262370000 | 1.846278000  | 1  | 6.745078000  | -4.017954000 | 2.552267000  |
| 6                                 | -3.299585000 | -3.489383000 | 1.374460000  | 1  | 8.334315000  | -2.937752000 | -2.084014000 |
| 6                                 | -3.527828000 | -3.684794000 | -0.047977000 | 1  | 8.346591000  | -5.535663000 | 1.366441000  |
| 6                                 | -4.778790000 | -3.032192000 | -0.393263000 | 1  | 9.126389000  | -5.005752000 | -0.912459000 |
| 6                                 | -4.908995000 | -2.374994000 | -1.620856000 | 8  | 5.133417000  | -1.462883000 | 2.369383000  |
| 6                                 | -5.585674000 | -1.087444000 | -1.686445000 | 8  | 6.624129000  | -0.454994000 | -1.870997000 |
| 6                                 | -4.903132000 | -0.260270000 | -2.664213000 | 1  | 4.345164000  | 0.515746000  | 1.242605000  |
| 6                                 | -4.748459000 | 1.112841000  | -2.429119000 | 1  | 6.567793000  | 1.636187000  | 0.119082000  |
| 6                                 | -5.305013000 | 1.706205000  | -1.220168000 | 1  | 5.419847000  | 2.058049000  | -1.131992000 |
| 6                                 | -4.388428000 | 2.738371000  | -0.767922000 | 1  | 2.698647000  | 2.061354000  | -0.132871000 |
| 6                                 | -4.167412000 | 2.925824000  | 0.598407000  | 35 | 2.794360000  | 2.098292000  | -2.621017000 |



|                   |              |              |              |    |              |              |              |
|-------------------|--------------|--------------|--------------|----|--------------|--------------|--------------|
| <b>MMF-TS(Cl)</b> |              |              |              |    |              |              |              |
| 6                 | -0.488439106 | -0.723970738 | 0.966230332  | 6  | 4.321879668  | 2.749171487  | -0.472090128 |
| 6                 | -0.935740823 | 0.670906555  | 0.478913299  | 6  | 4.851456044  | 2.271850807  | -1.738364278 |
| 6                 | -0.986566241 | 0.431088518  | -1.068504848 | 6  | 3.829408065  | 2.468571261  | -2.759159463 |
| 6                 | -0.903090863 | -0.980316539 | -1.338792928 | 6  | 3.680736696  | 1.524260383  | -3.786820111 |
| 6                 | -0.596687269 | -1.681322405 | -0.104667295 | 6  | 4.523915472  | 0.341369013  | -3.807314437 |
| 6                 | 0.196802735  | -2.835451798 | -0.144087135 | 6  | 3.716940600  | -0.786467860 | -4.253949530 |
| 6                 | 1.202476381  | -3.035741238 | 0.871230086  | 6  | 3.913672399  | -2.052521419 | -3.695597475 |
| 6                 | 1.362932226  | -2.067828637 | 1.870855226  | 6  | 4.930307297  | -2.251362429 | -2.673964957 |
| 6                 | 0.509605903  | -0.895065829 | 1.909366633  | 6  | 5.701199038  | -1.164944224 | -2.244004201 |
| 6                 | 1.326479597  | 0.235357131  | 2.383747183  | 6  | 5.999890416  | -0.993688088 | -0.832926601 |
| 6                 | 1.133968228  | 1.482598559  | 1.782421801  | 6  | 5.979126917  | 0.431931091  | -0.538347015 |
| 6                 | 0.103024410  | 1.726533514  | 0.814239555  | 6  | 5.667321488  | 1.139305350  | -1.770917992 |
| 6                 | 0.625760430  | 2.598378780  | -0.162597304 | 6  | 5.500896616  | 0.151622371  | -2.826634859 |
| 6                 | 0.326564342  | 2.488206826  | -1.548685126 | 6  | -2.336777232 | 0.995782483  | 0.062671027  |
| 6                 | -0.452717441 | 1.346895549  | -1.978713500 | 6  | -3.364531888 | -0.034071285 | -0.252424777 |
| 6                 | 0.088960654  | 0.863722175  | -3.243257377 | 6  | -4.468396987 | 0.344634657  | -1.280433780 |
| 6                 | 0.105643660  | -0.503645581 | -3.528012914 | 8  | -3.328338678 | -1.159597210 | 0.217591030  |
| 6                 | -0.412059178 | -1.451742980 | -2.562115111 | 7  | -5.424743394 | -0.754552135 | -1.357256194 |
| 6                 | 0.435151926  | -2.632785972 | -2.593233309 | 6  | -5.170981321 | 1.723255867  | -1.099860057 |
| 6                 | 0.730219420  | -3.314265344 | -1.412313297 | 6  | -4.489422503 | 2.884590039  | -1.803298736 |
| 6                 | 2.076678114  | -3.802074953 | -1.172501474 | 6  | -3.984658803 | 3.971890711  | -1.075222100 |
| 6                 | 2.368543163  | -3.630459681 | 0.244130431  | 6  | -4.389197586 | 2.912898668  | -3.204346938 |
| 6                 | 3.651187063  | -3.245482492 | 0.646793993  | 6  | -3.399610794 | 5.059774023  | -1.731553646 |
| 6                 | 3.818880100  | -2.255469615 | 1.701566806  | 6  | -3.800206309 | 3.995035477  | -3.861004785 |
| 6                 | 2.691923285  | -1.676134540 | 2.292975341  | 6  | -3.303985378 | 5.075932346  | -3.124650811 |
| 6                 | 2.666690247  | -0.251025129 | 2.597386423  | 1  | -4.044056040 | 3.959515108  | 0.009915145  |
| 6                 | 3.789908488  | 0.538429873  | 2.290611586  | 1  | -4.777359812 | 2.080231209  | -3.789247966 |
| 6                 | 3.587644920  | 1.850023690  | 1.706769756  | 1  | -3.007849754 | 5.889322190  | -1.147775602 |
| 6                 | 2.291983759  | 2.310522360  | 1.462425470  | 1  | -3.728314600 | 3.994131028  | -4.946267362 |
| 6                 | 1.980795790  | 3.008105393  | 0.239496381  | 1  | -2.840553966 | 5.917935155  | -3.633251150 |
| 6                 | 2.970242714  | 3.228493291  | -0.713139899 | 6  | -5.352784357 | -1.740308441 | -2.354111043 |
| 6                 | 2.673712354  | 3.067873181  | -2.131785943 | 6  | -6.325543233 | -1.111055532 | -0.334689785 |
| 6                 | 1.379547530  | 2.681198782  | -2.518324779 | 6  | -6.329162561 | -2.798881786 | -1.960869323 |
| 6                 | 1.224803093  | 1.691620832  | -3.580200299 | 6  | -6.909170438 | -2.423979338 | -0.748789967 |
| 6                 | 2.347590417  | 1.128503478  | -4.197159229 | 6  | -6.681389872 | -3.979380441 | -2.601665277 |
| 6                 | 2.368910148  | -0.298044032 | -4.488802500 | 6  | -7.865093678 | -3.214617835 | -0.125775805 |
| 6                 | 1.268476334  | -1.097122216 | -4.167647242 | 6  | -7.643003943 | -4.788607151 | -1.979723378 |
| 6                 | 1.474216553  | -2.414495639 | -3.586260752 | 6  | -8.225956481 | -4.411776373 | -0.760842644 |
| 6                 | 2.770313500  | -2.885128146 | -3.358077661 | 1  | -6.221161384 | -4.262308630 | -3.543905723 |
| 6                 | 3.078777007  | -3.593049362 | -2.125150790 | 1  | -8.306969677 | -2.913905604 | 0.819718032  |
| 6                 | 4.411866666  | -3.196865687 | -1.702323692 | 1  | -7.940232321 | -5.724167099 | -2.446598846 |
| 6                 | 4.692763913  | -3.030475900 | -0.340208593 | 1  | -8.966197947 | -5.061291991 | -0.300591716 |
| 6                 | 5.500338727  | -1.904419582 | 0.102604035  | 8  | -4.639499133 | -1.696642203 | -3.340279818 |
| 6                 | 4.971270665  | -1.434074315 | 1.372812577  | 8  | -6.584829994 | -0.448974722 | 0.649007887  |
| 6                 | 4.943450866  | -0.062511721 | 1.652117846  | 1  | -3.964450560 | 0.334731691  | -2.255664138 |
| 6                 | 5.466035405  | 0.887146117  | 0.677632752  | 1  | -6.176980380 | 1.608458275  | -1.521413240 |
| 6                 | 4.624442585  | 2.072210921  | 0.713598457  | 1  | -5.296189993 | 1.938104752  | -0.037194526 |
|                   |              |              |              | 1  | -2.422613755 | 1.939862092  | -0.462395963 |
|                   |              |              |              | 17 | -3.238331966 | 1.199741720  | 2.331613443  |
| <b>MMF-TS(Br)</b> |              |              |              |    |              |              |              |
| 6                 | -0.613552824 | -0.695666191 | 1.281103973  | 6  | 4.196765950  | 2.777476034  | -0.157216486 |
| 6                 | -1.060854541 | 0.699211102  | 0.793786941  | 6  | 4.726342326  | 2.300155354  | -1.423490636 |
| 6                 | -1.111679959 | 0.459393065  | -0.753631207 | 6  | 3.704294347  | 2.496875808  | -2.444285821 |
| 6                 | -1.028204581 | -0.952011992 | -1.023919286 | 6  | 3.555622978  | 1.552564930  | -3.471946469 |
| 6                 | -0.721800987 | -1.653017858 | 0.210206347  | 6  | 4.398801754  | 0.369673560  | -3.492440796 |
| 6                 | 0.071689017  | -2.807147251 | 0.170786507  | 6  | 3.591826881  | -0.758163313 | -3.939075888 |
| 6                 | 1.077362663  | -3.007436691 | 1.186103727  | 6  | 3.788558681  | -2.024216872 | -3.380723834 |

|                          |              |              |              |    |              |              |              |
|--------------------------|--------------|--------------|--------------|----|--------------|--------------|--------------|
| 6                        | 1.237818508  | -2.039524090 | 2.185728867  | 6  | 4.805193579  | -2.223057882 | -2.359091316 |
| 6                        | 0.384492185  | -0.866761281 | 2.224240275  | 6  | 5.576085320  | -1.136639677 | -1.929130560 |
| 6                        | 1.201365879  | 0.263661678  | 2.698620824  | 6  | 5.874776698  | -0.965383541 | -0.518052960 |
| 6                        | 1.008854510  | 1.510903106  | 2.097295443  | 6  | 5.854013198  | 0.460235638  | -0.223473373 |
| 6                        | -0.022089308 | 1.754838062  | 1.129113197  | 6  | 5.542207770  | 1.167609897  | -1.456044350 |
| 6                        | 0.500646712  | 2.626683327  | 0.152276337  | 6  | 5.375782897  | 0.179926918  | -2.511761218 |
| 6                        | 0.201450624  | 2.516511373  | -1.233811484 | 6  | -2.461890950 | 1.024087031  | 0.377544668  |
| 6                        | -0.577831160 | 1.375200096  | -1.663839859 | 6  | -3.489645606 | -0.005766737 | 0.062448865  |
| 6                        | -0.036153064 | 0.892026722  | -2.928383735 | 6  | -4.593510706 | 0.372939204  | -0.965560139 |
| 6                        | -0.019470058 | -0.475341033 | -3.213139272 | 8  | -3.453452397 | -1.131292663 | 0.532464672  |
| 6                        | -0.537172896 | -1.423438433 | -2.247241469 | 7  | -5.549857113 | -0.726247588 | -1.042382552 |
| 6                        | 0.310038208  | -2.604481425 | -2.278359667 | 6  | -5.296095039 | 1.751560414  | -0.784986415 |
| 6                        | 0.605105702  | -3.285960797 | -1.097439656 | 6  | -4.614536222 | 2.912894587  | -1.488425095 |
| 6                        | 1.951564395  | -3.773770406 | -0.857627833 | 6  | -4.109772521 | 4.000195258  | -0.760348458 |
| 6                        | 2.243429445  | -3.602155134 | 0.559004072  | 6  | -4.514311304 | 2.941203215  | -2.889473296 |
| 6                        | 3.526073345  | -3.217177945 | 0.961667635  | 6  | -3.524724512 | 5.088078571  | -1.416680005 |
| 6                        | 3.693766382  | -2.227165068 | 2.016440448  | 6  | -3.925320027 | 4.023340024  | -3.546131144 |
| 6                        | 2.566809567  | -1.647829993 | 2.607848983  | 6  | -3.429099096 | 5.104236893  | -2.809777170 |
| 6                        | 2.541576529  | -0.222720582 | 2.912260065  | 1  | -4.169169758 | 3.987819655  | 0.324788786  |
| 6                        | 3.664794770  | 0.566734420  | 2.605485227  | 1  | -4.902473530 | 2.108535756  | -3.474374324 |
| 6                        | 3.462531202  | 1.878328237  | 2.021643397  | 1  | -3.132963472 | 5.917626737  | -0.832901960 |
| 6                        | 2.166870040  | 2.338826907  | 1.777299111  | 1  | -3.853428319 | 4.022435575  | -4.631393721 |
| 6                        | 1.855682072  | 3.036409940  | 0.554370023  | 1  | -2.965667684 | 5.946239702  | -3.318377508 |
| 6                        | 2.845128996  | 3.256797838  | -0.398266258 | 6  | -5.477898075 | -1.712003894 | -2.039237401 |
| 6                        | 2.548598635  | 3.096177728  | -1.816912302 | 6  | -6.450656952 | -1.082750985 | -0.019816144 |
| 6                        | 1.254433812  | 2.709503329  | -2.203451138 | 6  | -6.454276279 | -2.770577239 | -1.645995682 |
| 6                        | 1.099689374  | 1.719925379  | -3.265326658 | 6  | -7.034284156 | -2.395674791 | -0.433916326 |
| 6                        | 2.222476699  | 1.156808025  | -3.882285587 | 6  | -6.806503590 | -3.951075894 | -2.286791636 |
| 6                        | 2.243796430  | -0.269739485 | -4.173928859 | 6  | -7.990207396 | -3.186313288 | 0.189097837  |
| 6                        | 1.143362616  | -1.068817669 | -3.852773600 | 6  | -7.768117661 | -4.760302604 | -1.664849737 |
| 6                        | 1.349102835  | -2.386191092 | -3.271387111 | 6  | -8.351070199 | -4.383471826 | -0.445969002 |
| 6                        | 2.645199782  | -2.856823598 | -3.043204020 | 1  | -6.346275102 | -4.234004083 | -3.229032081 |
| 6                        | 2.953663289  | -3.564744814 | -1.810277149 | 1  | -8.432083395 | -2.885601057 | 1.134591674  |
| 6                        | 4.286752948  | -3.168561140 | -1.387450050 | 1  | -8.065346039 | -5.695862552 | -2.131725205 |
| 6                        | 4.567650195  | -3.002171353 | -0.025334952 | 1  | -9.091311665 | -5.032987444 | 0.014281926  |
| 6                        | 5.375225008  | -1.876115035 | 0.417477676  | 8  | -4.764612851 | -1.668337656 | -3.025406176 |
| 6                        | 4.846156947  | -1.405769768 | 1.687686218  | 8  | -6.709943712 | -0.420670175 | 0.963881529  |
| 6                        | 4.818337147  | -0.034207174 | 1.966991487  | 1  | -4.089564278 | 0.363036238  | -1.940790497 |
| 6                        | 5.340921687  | 0.915450664  | 0.992506393  | 1  | -6.302094098 | 1.636762822  | -1.206539598 |
| 6                        | 4.499328866  | 2.100515468  | 1.028472098  | 1  | -5.421303712 | 1.966409299  | 0.277679115  |
|                          |              |              |              | 1  | -2.547727474 | 1.968166639  | -0.147522322 |
|                          |              |              |              | 35 | -3.077619459 | 1.941069898  | 2.687673059  |
| <b>MMF = -3259.85529</b> |              |              |              |    |              |              |              |
| 6                        | 0.926675000  | -1.207219000 | 1.030020000  | 6  | -2.693051000 | 1.847005000  | -2.860798000 |
| 6                        | 1.220074000  | 0.261742000  | 0.984700000  | 6  | -3.994169000 | 2.021525000  | -2.225572000 |
| 6                        | 0.346694000  | 0.873274000  | 2.035092000  | 6  | -3.805249000 | 2.846157000  | -1.035350000 |
| 6                        | -0.235532000 | -0.192876000 | 2.821358000  | 6  | -4.540287000 | 2.577105000  | 0.122301000  |
| 6                        | 0.115608000  | -1.465535000 | 2.204468000  | 6  | -5.496149000 | 1.477146000  | 0.141501000  |
| 6                        | -0.798089000 | -2.525820000 | 2.233064000  | 6  | -5.441571000 | 0.854344000  | 1.461714000  |
| 6                        | -0.975925000 | -3.346786000 | 1.051751000  | 6  | -5.569240000 | -0.532448000 | 1.586186000  |
| 6                        | -0.234230000 | -3.061509000 | -0.100974000 | 6  | -5.751806000 | -1.357746000 | 0.396229000  |
| 6                        | 0.727324000  | -1.970697000 | -0.112780000 | 6  | -5.804002000 | -0.762022000 | -0.866923000 |
| 6                        | 0.673166000  | -1.340526000 | -1.449038000 | 6  | -5.112538000 | -1.379169000 | -1.994521000 |
| 6                        | 0.818656000  | 0.032491000  | -1.598384000 | 6  | -4.559615000 | -0.313513000 | -2.822987000 |
| 6                        | 1.158888000  | 0.942803000  | -0.457512000 | 6  | -4.908040000 | 0.963556000  | -2.206256000 |
| 6                        | 0.237569000  | 2.113081000  | -0.594456000 | 6  | -5.675718000 | 0.685872000  | -0.997590000 |
| 6                        | -0.422202000 | 2.678594000  | 0.488304000  | 6  | 2.436586000  | 0.972595000  | 0.384187000  |
| 6                        | -0.367226000 | 2.046104000  | 1.827550000  | 6  | 3.653234000  | 0.212322000  | -0.018047000 |

|   |              |              |              |   |             |              |              |
|---|--------------|--------------|--------------|---|-------------|--------------|--------------|
| 6 | -1.672570000 | 2.216748000  | 2.448073000  | 6 | 5.012957000 | 0.896759000  | 0.229032000  |
| 6 | -2.216811000 | 1.204084000  | 3.248578000  | 8 | 3.593252000 | -0.930345000 | -0.497047000 |
| 6 | -1.480741000 | -0.030621000 | 3.439618000  | 7 | 6.079423000 | -0.090808000 | 0.112811000  |
| 6 | -2.434075000 | -1.135007000 | 3.462888000  | 6 | 5.281324000 | 2.135345000  | -0.688754000 |
| 6 | -2.099871000 | -2.354833000 | 2.871365000  | 6 | 4.490578000 | 3.381258000  | -0.335471000 |
| 6 | -3.086608000 | -3.075223000 | 2.074380000  | 6 | 3.568710000 | 3.925463000  | -1.245382000 |
| 6 | -2.390565000 | -3.689571000 | 0.947567000  | 6 | 4.685851000 | 4.035248000  | 0.895933000  |
| 6 | -3.004749000 | -3.742794000 | -0.306485000 | 6 | 2.852051000 | 5.086794000  | -0.932557000 |
| 6 | -2.229654000 | -3.457992000 | -1.511118000 | 6 | 3.969048000 | 5.193811000  | 1.211901000  |
| 6 | -0.877702000 | -3.122270000 | -1.408139000 | 6 | 3.048206000 | 5.722512000  | 0.298011000  |
| 6 | -0.320845000 | -2.056567000 | -2.233414000 | 1 | 3.414824000 | 3.437372000  | -2.203548000 |
| 6 | -1.146477000 | -1.373181000 | -3.134340000 | 1 | 5.408801000 | 3.642455000  | 1.606681000  |
| 6 | -1.022348000 | 0.065710000  | -3.263417000 | 1 | 2.143629000 | 5.491643000  | -1.648114000 |
| 6 | -0.076125000 | 0.747521000  | -2.488844000 | 1 | 4.132938000 | 5.686248000  | 2.165225000  |
| 6 | -0.428298000 | 2.021769000  | -1.875303000 | 1 | 2.492728000 | 6.622028000  | 0.542637000  |
| 6 | -1.705905000 | 2.562677000  | -2.059335000 | 6 | 6.628004000 | -0.729674000 | 1.249514000  |
| 6 | -2.388101000 | 3.179512000  | -0.937729000 | 6 | 6.551631000 | -0.670040000 | -1.089816000 |
| 6 | -1.760126000 | 3.224112000  | 0.314109000  | 6 | 7.552526000 | -1.767797000 | 0.729177000  |
| 6 | -2.530894000 | 2.944489000  | 1.520203000  | 6 | 7.502753000 | -1.736400000 | -0.672649000 |
| 6 | -3.889952000 | 2.632374000  | 1.428550000  | 6 | 8.366590000 | -2.666250000 | 1.406591000  |
| 6 | -4.452884000 | 1.570359000  | 2.257719000  | 6 | 8.266822000 | -2.602417000 | -1.443355000 |
| 6 | -3.634125000 | 0.872768000  | 3.149956000  | 6 | 9.142043000 | -3.548710000 | 0.635030000  |
| 6 | -3.769053000 | -0.575626000 | 3.282586000  | 6 | 9.092471000 | -3.517487000 | -0.767437000 |
| 6 | -4.715057000 | -1.263040000 | 2.515719000  | 1 | 8.397970000 | -2.684188000 | 2.490179000  |
| 6 | -4.366524000 | -2.539986000 | 1.898852000  | 1 | 8.221422000 | -2.572503000 | -2.526138000 |
| 6 | -5.006308000 | -2.597451000 | 0.589434000  | 1 | 9.787951000 | -4.266271000 | 1.129761000  |
| 6 | -4.340041000 | -3.187708000 | -0.489122000 | 1 | 9.700492000 | -4.211893000 | -1.337560000 |
| 6 | -4.393926000 | -2.564489000 | -1.809418000 | 8 | 6.355132000 | -0.433530000 | 2.421733000  |
| 6 | -3.092126000 | -2.734798000 | -2.441981000 | 8 | 6.244559000 | -0.314976000 | -2.234650000 |
| 6 | -2.561167000 | -1.715539000 | -3.236592000 | 1 | 5.033524000 | 1.221965000  | 1.277658000  |
| 6 | -3.311332000 | -0.478729000 | -3.431747000 | 1 | 6.353970000 | 2.347067000  | -0.594376000 |
| 6 | -2.358327000 | 0.625315000  | -3.448372000 | 1 | 5.111512000 | 1.849681000  | -1.729381000 |
|   |              |              |              | 1 | 2.632072000 | 1.941211000  | 0.829554000  |
